# **Researchers and their experimental models: A pilot survey.**

**Lorenzo Del Pace<sup>a</sup>, Laura Viviani<sup>b</sup>, and Marco Straccia<sup>c</sup>.**

<sup>a</sup> Independent consultant, Latina, Italy.

<sup>b</sup> Independent consultant, Basel, Switzerland.

<sup>c</sup> FRESCI by SCIENCE&STRATEGY SL, Barcelona, Spain.

## **Corresponding autor:**

Dr. Marco Straccia, PhD MBA

E-Mail: marco.straccia@fre-sci.com

## ABSTRACT

A significant debate is ongoing on the effectiveness of animal experimentation due to the increasing reports of failure in the translation of results from preclinical animal experiments to human patients. Scientific, ethical, social and economic considerations linked to the use of animals raise concerns in a variety of societal contributors (regulators, policy makers, non-governmental organisations, industry, etc.).

The aim of this study was to record researchers' voice about their vision on this science evolution, to reconstruct as truthful as possible an image of the reality of health and life science research, by using a key instrument in the hands of the researcher: the experimental models.

Hence, we surveyed European-based health and life sciences researchers, to reconstruct and decipher the varying orientations and opinions of this community over these large transformations. In the interest of advancing the public debate and more accurately guide the policy of research, it is important that policy makers, society, scientists and all stakeholders (1) mature as comprehensive as possible an understanding of the researchers perspectives on the selection and establishment of the experimental models, and (2) publicly share research community opinions, regarding the external factors influencing their professional work.

Our results highlighted a general homogeneity of answers from the 117 respondents.

However some discrepancies on specific key issues and topics were registered in the subgroups. These recorded divergent views might prove useful to research policy makers and regulators to calibrate their agenda and shape the future of the European health and life science research.

## INTRODUCTION

In September 2021, the European Parliament adopted a resolution with 667 votes to four on a EU-wide action plan for phasing out the use of animals in research and testing<sup>1</sup>. Members of the European Parliament requested sufficient medium- and long-term funding and coordination to further promote the development and deployment of alternative methods and models<sup>1</sup>.

The current EU legislation providing the legal framework for animal use in science is Directive 2010/63/EU<sup>2</sup>, which dictates the animal welfare terms to follow when using

animals for research purposes. The Directive makes mandatory the application of the Three Rs Principles (replacement, reduction and refinement) of animal use in science, with the final aim of Directive 2010/63/EU being the ultimate replacement of procedures on live animals. The EU willingness in animal welfare has brought, so far, to stop animal testing for finished cosmetics products since 11 September 2004 and for cosmetic ingredients since 11 March 2009<sup>3</sup>.

The statistics on the use of animals for research are monitored and made publicly available by the European Commission, through the recently launched online platform ALURES<sup>4</sup> which provides a new high level of transparency on animal-based research. In fact, Directive 2010/63/EU, amended by Regulation (EU)2019/1010 (Article 6)<sup>5</sup>, requires the European Commission and the EU Member States to make publicly available the statistical data on the use of animals for scientific purposes. The latest statistical summary reports<sup>6</sup> available on the use of animals for experimentation published by the European Commission for 2018 reported the use of more than 10 million animals (10.572.305), in the EU-28 and Norway<sup>7</sup>.

Interestingly, most of the animals (73%) were used in basic (46%) and translational-applied (27%) research. In particular for studying human diseases and non-regulatory toxicology, falling into the category of translational and applied research, a total of 1.873.677 (18%) animals were used in 2018. Although animal experimentation has led and still leads to successful medical treatment for people in our society, the latter data on animal use in research are linked to an increasing clinical trials failure rate<sup>8</sup>. This augmented failure is also due to the poor translatability from animal preclinical models to human patients<sup>10,11,12</sup> raising questions concerning the ethical issues of animal use in, and the economic cost of biomedical research<sup>9</sup>.

EU legislation together with the societal pressure to stop animal experimentation<sup>12,13</sup> and the data from the statistics are generating an important external pressure on researchers of health and life sciences using animals<sup>14,15</sup>.

The existence of a variety of stakeholders continuously engaged in favour<sup>16,17</sup> or not in accord with<sup>18,19</sup> animal research activities, including both researchers and citizens, shows what could be the epiphenomenon of a certain degree of underlying societal polarization on the theme<sup>20</sup>. A polarization that through civilized dissent and scientific argumentation eventually reaches the political sphere, raising the question of what influence it produces on the scientific community.

In fact, the debate has widened to other stakeholder communities: scientists and regulators have been joined by a host of committed societal interlocutors<sup>12,21</sup>. These are not directly involved in the practice of science, but they have great interest in it. These new societal interlocutors never before have experienced the capability to successfully engage decision makers on scientific topics, raise public support, run information and awareness campaigns, and succeed in enacting boundaries to scientific research through policymaking. This golden era of science, born from the effective deployment of multiple solutions to overcome the COVID-19 pandemic, coincides with the age of full accountability, where responsibility towards patients, citizens and granting institutions is just part of the answers that scientists are called on to explain their work.

Both the research community<sup>22,23</sup> and those stakeholders (policy makers, non-governmental organisations, industry, funding bodies and regulators) which are fully involved in the Three Rs debate are influenced, and react to this polarization, something that has prompted the European Commission to the analysis of the drivers and barriers to the improvement of cross disciplinary solutions in the biosciences<sup>24</sup>. Many efforts<sup>25</sup> are ongoing to promote and inform all parties of the policy development activity<sup>26</sup>, the regulatory needs<sup>27</sup> and to appropriately relay to the scientific community the calls from non-scientific stakeholders<sup>12</sup>.

The aim of this study was to record researchers' voice about their vision on this ongoing scientific transformation, to reconstruct as truthful as possible an image of the reality of health and life science research, by using a key instrument in the hands of the researcher: the experimental models. In this view, it is important for society and for scientists (1) to understand researchers perspectives on the selection and establishment of their models of use and (2) to share the researchers community opinion regarding the external factors and stakeholders influencing their professional work.

In the interest of advancing the public debate and informed research policies, the results of this survey will provide reliable data to interested parties and regulator, as a starting point for helping mitigate perception biases among the interested parties and reshape the public discourse in a way most useful to science and respectful of society.

## MATERIAL AND METHODS

From October 2020 to June 2021, a survey was conducted among health and life science researchers working in Europe, in order to collect their views on the use of the experimental models in research. An [online questionnaire](#)<sup>28</sup> was developed and distributed among a conspicuous number of European researchers.

### QUESTIONNAIRE DESIGN

The outline of the questionnaire was developed by the three authors and was based on: (I) a previously conducted survey among researchers involved in biomedical research in European bioclusters ecosystem and (II) multiple rounds of peer-reviews through researchers and experts. The survey was descriptive in nature and included both qualitative and quantitative questions. The questionnaire was tested by 10 researchers and adjusted on the basis of their feedback. The use of closed-ended questions ensured that respondents were consistent in their answers. There was room to give additional comments to questions in case a respondent did not consider the provided set of answers exhaustive. Some questions allowed for multiple answers, e.g. on information sources. The language of the original questionnaire was English. The survey contained 22 questions grouped in 8 thematic areas: Participant information (9), Research Models (4), Funding (2), Drivers & Barriers (3), Education (1), 2010/63/EU Directive (1), Future Perspectives (2). Of those 22 questions, five were “container questions”: respondents were not asked to submit a single answer, rather they are confronted with either rating a series of statements related to a specific topic or issue, or to express their opinion on a topic, or to assess concerns and/or expected benefits specific to certain topics. Container questions are tools to investigate the same specific issue, attitude, concern, or acquired knowledge from different viewpoints. This brings the gross total of survey answers to 49 for researchers with no teaching activity and to 52 to researchers involved in teaching activities.

### QUESTIONNAIRE DISTRIBUTION

A link to the online questionnaire was distributed among private companies (contract research organisations, pharmaceutical and chemical industry, etc.), major universities and research Institutions, European scientific societies and associations through several actions: 1) e-mail campaign: approximately 500 e-mails were sent to subjects of each European country, including Switzerland and UK. Most of the emails were sent to specific recipients

identified as possible point of contacts, and to a minor number of institutional addresses, with a final total number of 16.668 e-mails; 2) LinkedIn post: the survey flyer and a direct link to the survey was posted on the LinkedIn profile of FRESCI and its consultants with 43 specific hashtags, tagging 20 direct contacts from key European associations with a total of 1143 views.

The questionnaire flyer was also posted in 11 LinkedIn groups: JRC Summer School (154 subscribers), Alertox Academy (269 subscribers), WC11Maastricht (442 subscribers), ESTIV (455 subscribers), Preclinical Toxicology Consultation Network (5.491 subscribers), Stem cell and Regenerative Medicine (6.923 subscribers), Neurodegenerative disorders (7.710 subscribers), FENS (12.808 subscribers), Science communication dissemination and exploitation (12.842), Stem Cell Research (14.064 subscribers), Science Network (281.842 subscribers); 3) other social media channels: Facebook, Instagram and Twitter were also used to distribute the survey link and information; 4) Hub strategy: relevant senior researchers or department heads were directly contacted and 5 of them shared the survey through their official communication channels; 5) Congress and meeting presentation: the survey was presented to many congress and meeting, such as Building Bridges Champalimaud Workshop, 11th World Congress on Alternatives and Animal Use in the Life Sciences 2021 and JRC summer school 2021, among others.

## **DATA ANALYSIS**

Despite the efforts of the authors, some misinterpretations cannot be ruled out. To safeguard anonymity and to exclude potential bias, the survey data were disconnected from the respondents' backgrounds and contact details. The results were analysed both per question and inter-related to perform segmentation analyses. The closed-ended multiple answer questions, the Yes/No questions, and the questions with scaled answers were analysed through counting frequencies in Excel. The answers to open questions were listed and categorized by inductive analysis. The data were analysed by the last author (MS) and discussed with LDP and LV.

Total participants were 119, however two contributors participated twice, and only the most complete set of answer was considered. One contribution was representing the common opinion of a 60 researchers department, as stated by the contributor in the final comment section. However we still considered this contribution as a single data point. Some of the

participants did not answer all the proposed questions. As such, the sum of results in the presented charts will not always correspond to the total number of participants. Container questions are graphed in a percentage scale to normalise the weight of the different groups, in addition the absolute number of voters are also reported in the respective histograms.

## **LIMITS OF THE STUDY**

The number of participants (117) has no statistical representation of the whole health and life science researchers population in Europe, however this survey had comparable participation in other international surveys in the Three Rs field or among researchers (see Supplementary Table 1).

Since the representation of Netherlands participants was half of the sampled population, we checked the unwanted sampling bias. We tested the two populations for the equality of variance (Test F) and for the unpaired two-tailed Student t-test for the following objective characteristics: user model type; Euraxess researcher descriptors<sup>29</sup>; involvement in regulatory science projects, engagement in teaching activities, use of genetic engineered models, opinion regarding high-impact factor journals publication and business exploitation. Test F found variance difference ( $p=0,032$ ) in the answer distribution regarding the opinion on high-impact factor journals publication and business exploitation. However, no statistical difference among the two populations' set of answers were observed through the Student-t's test.

## RESULTS

### Participants information.

From October 27, 2010, to August 31, 2021, we recorded a total of 119 contributions to our survey, 117 of which were unique replies. The survey participants were almost equally distributed by gender, with 59 females and 56 males respondents (Figure 1). Researchers in the age range of 35-44 years old (y.o) were the most represented, 37 in total. Female researchers below 35 y.o. have contributed considerably more than male researchers of the same age, 21 versus 9 contributions. The opposite is true for the over 44 y.o. participants group, where male respondents numbered higher than the female counterparts, 31 versus 19 (Figure 1).

Participants conducted their research in Europe, as targeted, with a major representation from the Netherlands (57), followed by Spain (14), Italy (12), France (6), Germany (6), Switzerland (4), Denmark (3), Portugal (3), Greece (2), United Kingdom (2), Poland (2), Austria (1), Belgium (1), Ireland (1), Lithuania (1) and Romania (1) (Supplementary Figure 1).

The majority of respondents have a single affiliation (79,5%), being academia the most represented (72,7%), followed by governmental research institutions (13,7%), non-governmental laboratories (6,0%), foundations (1,7%), biotech companies (1,7%) and regulatory bodies (1,7%). Academics were the group with more participants having two or more affiliations (17,1%), followed by non-governmental (2,6%) and governmental (0,9%) researchers.

Researchers were classified by using the Euraxess research profiles descriptors<sup>29</sup>, where R1 is up to the point of PhD; R2 are PhD holders or equivalent who are not yet fully independent; R3 are researchers who have developed a level of independence; and R4 are researchers leading their research area or field. Of those who responded to the survey, the majority of researchers had a R3 profile (38; 32%) followed by R2 (31, 27%), R4 (26, 22%) and R1 researchers (22; 19%).

### Participants research fields and models.

The most common fields of research reported by participants were in the neuroscience sector (15,6%), followed by toxicology (9,9%), oncology (5,7%), biomedicine (5,0%) and



regenerative medicine (4,3%). Other 49 disciplines were also registered (see Supplementary Table 2).

We then classified the participants by the type of model they were mainly using. A total of 37,6% of the participants relied on both human and animal models in their experimental research, followed by 33,3% of researchers using human-based models and 25,6% of respondents implemented animal models. Moreover, a 3,4% stated a reliance on other methods, without indicating the data/samples source. Furthermore, of those who responded (98), forty-one were using genetic engineered models. Deepening the analysis on the models used by the participants, the most frequent model used by participants were primary cell cultures (60), followed by immortalized cells (53), biochemical assays (45), stem cells (45), live organism (33), organoids (33), biopsies (23) and other microphysiological systems (21; i.e. Organ-on-Chip). Other models were also reported (data not shown).

### **Experimental model establishment.**

Participants were asked whether their model of choice was selected or established. The majority of answers pointed to literature review (58). Fifty-one researchers also answered that the model was self-developed, this is particularly true for human-based model users (23) and researchers who used both animal and human-based models (22) (Figure 3). Inheritance represented the third most frequent factor for models selection: 37 respondents declared that the model in use was already established in the research group of work. Also, the mentor experience was reported as a factor to select the experimental model. Lastly, benchmarking is the fourth method most reported to select or to establish a model, especially for those researchers using both human and animal-based models. Five researchers stated their chosen model to be the only one available, while 7 reported to having relied on other methods to choose and select their models.

Of those respondents who reported that model in use was their own development, nineteen of them did not indicate reliance on any other method to establish their models. The distribution of these 19 respondents by their researchers profile is the following: 12 for R3-R4, 3 for R2-R3 and 4 for R1.

## **The model in use.**

We asked the participants to rate a series of statements regarding their experimental models. Rating ranged from 1 to 5 stars, with 1-star indicating complete disagreement and 5-stars full agreement with the statement. We stratified the researchers' answers by the type of models they used: animal-based, human-based and both animal and human-based models (Figure 4).

*The model I am using has been standardized/qualified or regulatory validated:* Users of animal models stated that their models are standardized and/or qualified or regulatory validated to a certain extent, in any case in major proportion compare to human-based model users. Users of both type of models rated the statement with a more balanced distribution with a tendency to consider their models as standardized/qualified or regulatory validated.

*The model I am using is affordable for my organisation, and/or I have access to good structures to use it:* All 3 groups did show high agreement with the statement, especially in the case of users of animal-based models.

*I have access to results of previous studies that used the same model that I am using:* Human-based model users, and users of both types of model, reported greater difficulty to access previous studies' results in comparison to animal model users.

*The model I am using was part of my educational curriculum:* Notably, most of the respondents reported that their models were not part of their educational curricula. Just a small proportion of respondents considered the models they employed as part of their educational path, in particular for those researchers using human-based models.

*I collaborate with other groups and researchers using or further developing the same experimental model I am working with:* All 3 types of users reported collaborating with peers to further develop the used models, highlighting the importance of the research network and collaboration. Partial disagreement was recorded in the case of animal-based model users.

*I know of other models relevant to my work, but I don't have access to them:* The majority of users, independently of model choice, disagreed with the question, meaning that only a small minority of them finds itself in the situation of knowing alternative methods, but not having the material opportunity to use them in their work.

## Perspectives on model acceptance.

To investigate the importance for researcher regarding the use of accepted models, we asked the following question: “How important is it for you that your chosen model is widespread and established in the scientific community at large?” (Figure 5).

An overwhelming majority of users deemed it either important (47,9%) or very important (38,5%) that their chosen model is widespread and established. Only a small minority (5,1%) seemed to consider the status of their chosen model in the research community as non-discriminant for their choice.

After surveying respondents on the importance they attach to the community status of a research model, further questions were posed to analyse the reaction to outlier cases.

Specifically, we probed the reaction to the eventual need to rely on not yet peer-reviewed methods, and the associated concerns or benefits expected by the participants by asking the following question: “If you had the need to use a still non-peer reviewed model or method, how would you rate the following concerns and benefits?”

*Difficulty in using or accessing new equipment:* On the one hand, 38,1% of respondents was not preoccupied with the possibility that the use of a non-peer reviewed model or method might hinder access to new equipment. On the other hand, 31,9% of researchers stated that when using a non-peer reviewed model it can be difficult to access or use new equipment. Finally, 30,0% did not consider the use of non-peer reviewed models neither a benefit nor a concern in accessing or use new equipment, especially for users of both animal and human-based models.

*Chance to access new funding opportunities (different funding programs, different donor organisations, etc.):* Opinions seemed to be almost equally split between the three possibilities of increased/neutral/decreased chances of new funding opportunities, with a similar trend for the three user groups. Neutral outlooks and negative outlooks were very identical (34.5%), with just slightly lower numbers sharing a positive outlook (31%). Disagreement was especially registered among users of animal-based and both animal- and human-based models, while the higher agreement was registered among human-based model users.

*Increased probability of breakthrough solutions:* The majority of respondents (44,2%) considered that the use of non-peer reviewed models would increase chance of breakthrough

solutions. About a third expressed a more neutral attitude (36,3%), while only a minority disagreed (19,5%).

*Difficulty in engaging superiors/supervisors:* Over half of the respondents (51,3%) did not consider the use of non-peer reviewed models a barrier to superiors and/or supervisors engagement. Only 22,1% reported that it could represent a difficulty. In the specific case of animal-based model users, the use of a non-peer reviewed model was completely balanced with respect to the difficulty or not in engaging superiors and/or supervisors.

*Difficulty in publishing your research:* Animal-based model users tended more (53,3%) to consider that the implementation of non-peer reviewed models in their research will increment the difficulty in publishing their results. For human-based model users the opinion was more balanced, with a slight tendency (41,0% vs 35,9%) to not see any difficulty in publishing their research when using non-peer reviewed models. In the case of users of both types of model, the 50% disagreed with the difficulty of publishing their research compared to the 36,4% who considered the use of non-peer reviewed models a barrier for publishing.

*Difficulty in comparing results among models:* The majority of respondents (60,2%), independently of their model of use, considered that the use of still non-peer reviewed models is an obstacle to compare results among models. Sixteen (13,2%) respondents from the three user groups expressed disagreement about facing such a difficulty when comparing results from non-peer reviewed models. Interestingly, three users (2,5%) of both types of model were in full disagreement with this difficulty. The remaining 24,1% of the respondents answered neutrally.

### **Willingness in methods and model sharing.**

Researchers were also sampled for their willingness to take part to a widened collaborative process, in this case exemplified by a plausible shared, open data platform, on which to collectively connect to share knowledge on new methods and models. Hence we asked: “Would you consider to connect on a shared open-data virtual platform with peers to develop, characterise, validate and share knowledge on new methods and/or models in your research field?”

The overwhelming majority answered positively, reinforcing the commonly held conception that research thrives through reliable communication channels among researchers, essential

tools to propel our knowledge forward in health and life sciences. Participants were asked about their willingness to connect with their peers through a shared open-data virtual platform and the great majority (84,0%) answered positively. Only 16% were negative on this proposal.

### **Research models drivers.**

The investigation on the perception of models, and on practical experience with them, was continued through questioning the respondents on the need of having animal experiments to complement *in vitro* or *in silico* human-based experimental models research, in order to publish in high impact factor journals or to foster business exploitation.

Complementing with animal experiments *in vitro/in silico* human-based results was seen as a necessity by the majority of respondents (58,1%) to publish in high impact factor journals or for the economic exploitation of their research.

Users of animal-based models were more strongly convinced of the necessity of complementing experiments (73,3% vs 26,7%), and a similar, albeit less marked trend was evident for users of both animal- and human-based models (59,1% vs 40,9%). Human-based model users are the only group with a majority convinced of the absence of such necessity (53,8% vs. 46,2%) (Figure 6).

To those respondents, who answered regarding the need of complementing *in vitro/in silico* human based results with animal experiments to publish in high impact factor journal or for business exploitation, we also asked for their direct experience (Figure 7). Notably the majority of all 3 groups had a direct experience on the issue, reinforcing their belief (Figure 7).

### **Research funding opportunities perception.**

Through the agreement level scoring of another series of statements, again rated from 1 to 5 stars, an analysis was performed of the personal expectations towards the evolution of future funding opportunities and to the level of future funding and project scrutiny (Figure 8).

*I am positive I will have increased funding opportunities in my research field:* The total distribution of researchers response was almost equally divided on this question, only sceptics were comparatively slightly more represented (29,2% optimistic vs. 31,0% neutral vs. 39,8% sceptic). Disaggregating the results, human-based model users were equally

396 distributed on this topic (30,8% optimistic vs. 35,9% neutral vs. 33,3% sceptic) in  
 397 comparison with the other two groups. In fact, animal-based model users answers were more  
 398 polarized (36,7% optimistic vs. 20,0% neutral vs. 43,3% sceptic). In contrast with the other  
 399 two groups, the answers by the users of both types of model showed less optimism in an  
 400 increase of funding in their research field (22,7% optimistic vs. 34,1% neutral vs. 43,2%  
 401 sceptic).

*The applications and limitations of research methods/models will be further scrutinised in grant applications:* Users of both human and animal based models were convinced that applications and limitations of research models will be further scrutinised (54,5% vs. 11,4%).

The situation was relatively more balanced for human-based (43,6% vs. 35,9%) and animal-based models users (36,7% vs. 26,7%), where both opposite perceptions are almost equally represented, with a small advantage for those believing in further scrutiny.

*More national funding will be directed to non-animal methods in the mid-term:* The majority of respondents (56,6%) expressed conviction that more funding for non-animal methods at national level will increase in the mid-term. Proportionally, more convinced in such mid-term strategy were the animal-based models users (63,3%) than the users of both animal- and human-based models (59,1%) or the users of human-based models (48,7%). About one fourth of the two latter groups expressed a neutral opinion.

*More national funding will be directed to animal-based methods in the mid-term:* Interestingly, the vast majority of respondents considered an increase in the mid-term funding towards animal-based methods unlikely. Strong agreement of a funding increase at national level was expressed only by 3 animal-based model users.

*Calls for projects will increasingly incentivise integration of different disciplines and methods:* Most of the respondents (74,3%) showed partial or full agreement with the proposed statement. A neutral opinion was held by 14,2% of respondents, while those in partial or complete disagreement were 11,5%.

*Calls for projects will increasingly incentivise strategies to translate research results into societal impact:* A great majority of all three groups of model users considered this statement true (48,7% are in full agreement, and 29,2% in partial agreement), believing that call for projects will increasingly stimulate the translatability of research results to boost societal impact.

## **Experimental research teaching experience.**

Teaching reflects the way a model, and a scientific mindset, are passed from one generation of researchers to the next. Hence surveying what teaching media are employed, how they are chosen and what experimental works presented has great relevance to understand what kind



of research perspectives are passed along to further generations. Of the 117 survey participants, 85 (72,6%) were engaged in teaching activities within their organisations (Figure 9). They were asked whether, in the course of those teaching activities, they were presenting mostly human-based or animal-based experimental works. Animal-based model users mostly (65,0%) declared using experimental works of both kinds. The same, although to a lesser degree (58,3%), was true for users of both animal-based and human-based models. A diametral opposite answer came instead from users of human-based models, where a very large majority (79,2%) chose human-based experimental works for teaching (Figure 9). We also asked the participants for the type of teaching media used and the ones they preferred.

The most common teaching media appeared to be *in vitro* models, with 42 overall users, and 6 for which it was also the preferred. Screen-based simulators were used by 17 respondents and preferred by 6. Virtual reality was also reported as used by 11 and preferred by 7; followed by 15 voters of other *in silico* methods, which was preferred by 3 of those respondents. Full body simulators, anatomical parts models, live animals, cadavers and actor-based simulations were also reported as teaching media with a smaller number of preferences, with the exception of the full body simulator that was the preferred by 7 respondents. Another important information is regarding the establishment of teaching media, so we asked: “How did you choose or establish your main teaching tool/media?”. Forty-three (37,7%) respondents declared the used teaching media was their own development, whereas 24 (21,1%) stated that it was already established in their field and/or department (Figure 20). Eighteen contributors (15,9%) established their teaching media and/or tools based on peers experience, 12 respondents (10,5%) reviewed the literature searching for educational resources, 12 (10,5%) compared different tools and media. Only 5 (4,3%) respondents declared that the tools/media they use were the only ones available (Supplementary Figure 2).



## **Continuing education in life science and biomedical research.**

Continuing education and constant training are essential facets of the career of a researcher.

The evolution and dissemination of knowledge often create the conditions to change established habits in specific research fields, and to influence and expand the wider perspective of the researchers.

Contributors were asked regarding their attendance to workshop or courses. We segmented their answers by the Euraxess researchers profiles (Figure 10) and by the type of model they used (Figure 11).

The group reporting higher continuing education rates was the R2 (87,7% of the R2 group total answers), closely followed by R3 (82,8% of the R3 group total answers), R4 (82,2% of the R4 group total answers) and R1 (82,1% of the R1 group total answers). R2 and R3 researchers particularly reported higher participation in animal welfare and non-animal models workshops, 57,9% and 60,3% respectively (Figure 10). Participation in improving experimental design workshops was also reported by all 4 groups of researchers, with an attendance between 17,2% and 28,2% depending on the respondents group. Subgroups ranging from 2,2% to 5,3% of the different profiles of researchers declared to have attended other types of courses or workshops. Notably, between 12,3% and 17,9% of each subgroup of researchers declared not having attended any workshop or course (Figure 10).

When segmenting the results by the type of experimental model used by the respondent, the highest level of attendance has been recorded by the users of animal-based methods (93,3%) (Figure 11). Users of both animal- and human-based models followed relatively closely (85,7%). Last in terms of attendance was the human-based model users group (68,8%).

Human-based model users reported higher attendance in non-animal models course (33,3%) compared to the other groups (21,7%, animal-based models users; 21,4%, both types models users) but lower attendance in experimental design courses (14,6% versus 28,3% and 25,0% of animal-based model users and both model users, respectively) (Figure 11).

## **Perception of stakeholder participation in science.**

Research policy is shaped and agreed through the interaction of a multiplicity of stakeholders, with scientists representing just one of those groups. However, science policy has immediate repercussions on the everyday professional activities – and possibilities – of the researchers. Their appraisal of the participation of stakeholders not directly involved in research activities in the definition of scientific policy is then of great significance.

Overall, respondents showed a consensus on the potential usefulness of the participation of most of the stakeholders in the discourse orienting research. The major exception was represented by political parties, where 49,6% of respondents considered them either as potentially dangerous or dangerous. The most negative perception was expressed by users of animal-based models, where 30,3% of respondents considered them dangerous (Figure 12).

On the other side of the spectrum, most of the researchers considered that participation of research foundations in the debate was useful (72,6%) (Figure 12).

All participants considered in general animal research non-governmental organisations (NGOs) rather useful, although with a certain hesitation, especially in the case of human-based model users. Also, animal protection NGOs benefit a general approval, although 30% of the users of animal-based models, and 20,4% of the users of both animal- and human-based models expressed neutrality (Figure 12).

The opinion on other research NGOs showed higher polarization: while 74,3% of human-based models users expressed a positive perception, a majority of users of animal-based models (56,6%) expressed instead a negative perception; users of both animal- and human-based models were almost equally split, with a significant minority (45,4%) manifesting apprehension (Figure 12).

Patients associations were seen largely useful by all three types of model users, however some users of each subgroup (from a 20,5% to a 30%) reported a potentially dangerous participation of this stakeholder segment (Figure 12).

Regulators were also seen very useful by all three types of users. Some users reported a potentially dangerous participation of this stakeholder segment (27,3% of both types of model users; 33,3% of animal-based models and 7,7% of human-based models users). A similar trend was observed for policy makers to the participation into the science policy debate. Interestingly a 9,1% of users of both types of model considered policy makers as a danger (Figure 12).

a 9,1% of users of both types of model considered policy makers as a danger (Figure 23). Pharmaceutical associations were favourably perceived by all the groups (60,2%), while other industry associations received a more polarized response (47,8%, potentially useful/useful; 10,6%, neutral; 41,6%, potentially dangerous/dangerous).

# **Researchers considerations on Directive 2010/63/EU.**

Directive 2010/63/EU is the regulatory framework regulating the use and selection of experimental models for the entire European Union. On the one hand, the Directive strives to protect animals used for research and other scientific purposes by establishing the necessary conditions for their welfare, while also calling for a continuous endeavour for the replacement and refinement of animal-based methods. On the other hand, the Directive 2010/63/EU also determines and causes an evolution in scientific practice through models and methods selection and use, since it envisions the complete replacement of animals for experimentation purposes as soon as it is scientifically possible to do so. It is the cornerstone legislation regulating and indirectly establishing a vision for European health and life science research. Given its importance, we decided to test participants, to evince what was the general level of knowledge and the effective comprehension of the Directive's content. The intentional convoluted question was necessary to discern a very superficial understanding of the Directive 2010/63/EU (i.e. animal protection legislation) from a more structured comprehension of its existing nuances. We segmented their answers by the Euraxess researchers profiles (Table 1) and by type of model users (Table 2). Of the 117 survey participants, 58 answered to not know whether the Directive 2010/63/EU acknowledges adequately the animal model by virtue of its being well known, predictable, widely used and established. Twenty-seven felt the Directive does not acknowledge adequately animal models because it requires the use of alternative methods and techniques if available. Seventeen participants considered that the Directive acknowledges the currently irreplaceable value of animal research. And 15 considered that the Directive poorly acknowledges the animals models as it aims at phasing out animal research. Segmenting the respondents by their Euraxess research profiles, we observed that most of R1 researchers (63,6%) did not know how to answer the question, followed by R3 (55,3%), R4 (42,3%) and R2 (38,7%). Notably, no single R1 researcher answered that the Directive poorly recognises the value of animal models (Table 1). Whereas, R2 and R3 researchers answering

that the Directive poorly acknowledges the animal models' virtue because its aim is to phase out animal research were more than the double of their R4 counterpart (R2 = 19,4% and R3 = 18,4% versus R4 = 7,7%) (Table 1).

A total of 26,9% of R4 Researchers considered the Directive 2010/63/EU to significantly recognises the irreplaceable value of animal research, compared to 12,9% of R2 , 10,7% of R1 and to 7,9% of R3 researchers (Table 1). R2 researchers considering that Directive is not acknowledging the value of animal models were 29,0%, whereas R1, R3 and R4 researchers were 22,7%, 18,4% and 23,1%, respectively (Table 1).

The segmentation by type of users showed that more than half of animal-based model users (53,3%) or users of both animal- and human-based models (52,3%) users did not know how to answer to the question (Table 2). This is a higher percentage than that registered for human-based model users (43,6%).

On the one hand, the 30,8% of human-based model users reported that the Directive 2010/63/EU requires the use of alternative methods and techniques if they are available, compared to 20,4% of both model types users and to the 16,7% of animal-based model users (Table 2). Moreover, 18,2% of both types of model users also answered that the Directive acknowledges the irreplaceable value of animal research, while human- and animal-based model users were less in agreement with this answer at lower degree, 12,8% and 10,0% respectively (Table 2). On the other hand, 20,0% of animal-based model users considered that the Directive 2010/63/EU poorly recognizes the value of animal models, since the final mission is to phase out animal research. This answer was shared by 12,8% of human-based and by 9,1% of both models users (Table 2).

As 59 out of 117 respondents were involved in regulatory science projects, we also segmented the answers regarding the Directive 2010/63/EU based on their involvement in a regulatory science project. Responses were similar among the two groups of researchers through this analysis (Supplementary Figure 3).

### **Researchers conditions for animal-based research phased-out.**

The Directive 2010/63/EU acknowledges the ultimate goal is to move European life and health science research towards a new era not relying on animals experimentation. While not achievable in the short term, this is a clear goal towards which scientific policy will work by deciding future funding and project evaluation guidelines. Surveying respondents on the

conditions for a phase out of animal research is thus essential to get their views of the junction where European research is, and what conditions are already, or ought to be met before such an advance can take place. Seventy-five respondents (64,1%), from the three groups of model users, either fully or partially agreed that a knowledge gap must be filled before phasing out the animal experimentation (Figure 13). However, eleven human-based model users (28,2%) felt neutral in this regard. Whereas, 16,2% of respondents either partially or fully disagree, and the lead in disagreement remained with the users of human-based models (7.6%) (Figure 13).

Regarding the need of a cultural change to take place in the scientific community, answers were less homogeneous: animal-based model users were the less convinced, with the majority of them (60,0%) disagreeing. Users of both animal- and human-based models, and of human models, were more positive in this regard. Although in both cases significant disagreement was recorded (53,8% positive vs 33,3% negative for the users of human-based models, and a slight inversion, 40,9% positive vs 47,7% negative for the users of both types of model) (Figure 13).

A need for concrete regulatory support was also seen as a requirement by the majority of three groups, with 54,9% of the respondents convinced of it (21,2% human-based, 14,2% animal-based and 19,5% both model users). While 26,5% of respondents felt no need for a concrete regulatory support to phase out animal research (6,2% human-based, 8,8% animal-based and 11,5% both model users).

The need for a wider collaboration between the different stakeholders was seen as a requirement for the phasing out by 48,7% of the contributors, especially from human and animal-based model users. While 18,8% shared a neutral stance on this point, and 29,1% disagreed.

The need to identify the drawbacks for each field of research for risk analysis was shared by all researchers. Particular agreement on this was recorded among the users of both animal- and human-based models (65,9%). Fifteen users of animal-based models (50,0%), and 20 users of human-based models (51,3%) shared this view. Twenty-eight (24,8%) of all the respondents disagreed, with the higher percentage of them being users of human-based models.

Questioned on the importance of making education on new models and methods mandatory through academic and extra-academic courses, 49,5% of all surveyed responded positively,

617 whilst 36,3% disagreed. By segmenting the votes by type of user, it emerged that the majority  
618 (59,0%) of human-based model users considered this as a necessity, followed by 50% of  
619 users of both types of model, while only 36,7% of animal-based model users were convinced  
620 of the need for this action. On the contrary, the majority of animal-based model users was  
621 convinced that this was not a necessary condition to reach the phasing out of animal research  
622 (53,3%), compared to 28,2% in the case of human-based model users, and 31,8% for users of  
623 both types of model (Figure 13).

## DISCUSSION

During the last decade, the debate on the use of animals in science has gradually intensified. The greater involvement of a variety of different stakeholders has produced a reshaping of the policy of science, and heightened both societal attention and expectations. This enlarged participation<sup>12,21</sup> in one of the key fields of society, the biomedical research, is taking place at higher levels where still few health and life sciences researchers are present.

Looking at the animal use statistics, biomedical scientists will be the most affected by policy changes in animal experimentation. However, in our experience there is a large number of biomedical researchers affected by the ongoing animal experimentation debate that are not properly informed or are not properly heard by the relevant stakeholders.

This is the reason why we decided to collect the health and life sciences researchers' opinions and visions of what the near future holds for biomedical research. This study was meant as a first step towards an understanding of the varying views of the researchers, and a starting point for further investigations to provide policy-makers with first-hand information on what the field professionals express as their preferences and expectations.

From a policy-making point of view, and in light of the ongoing debate, we deemed it important to analyse the whole life cycle of experimental models, from its initial selection, to its daily use and teaching to the following generations, and the future expectations in the area. This is because a model defines the research activity and embodies the deeper perspective of how research ought to take place as well as its limits.

Analysing the data, interestingly, we observed a general homogeneity of answers on a multiplicity of topics independently of the segmentation analysis we performed. This observed overarching uniformity may be suggestive of a common "Gestalt" shared by the research community as a whole. Although differences of opinion were expressed by researchers using different models (human-, animal-based or both), our results suggested that different groups of biomedical researchers saw the scientific endeavour through common lenses, which might well provide a needed common ground to establish a fruitful dialogue among researchers who invested in different models. Still, we must acknowledge two specific limitations in this study, which is very important to calibrate further discussion: 1) the number of participants was not statistically representative of the health and life sciences researchers population working in Europe and, 2) the 48,7% of the our respondents operated in the Netherlands. Even though we performed a statistical control for the sampling bias (see



material and methods) between the sampled population from the Netherlands and the rest of participants for certain answers, we cannot exclude a further sources of a possible bias in the overall analysis, especially considering the ambition of the Dutch government<sup>30</sup>.

Reviewing the collected data, only a minority of respondents declared using a model that was part of their education curriculum. Another minority reported that other models possibly useful in their activity existed, but that they had no access to them. This answer might suggest that model choice is sometimes driven by the level of accessibility inside the research group or environment.

We also looked at the other end of the cycle, which is the models selection for teaching. This is an aspect of great importance, because through teachers, future researchers are exposed to certain perspectives on research at a key junction of their career, when they are still building their whole perception of the scientific endeavour. In this case, some interesting differences emerged among the 3 groups of model users. The majority of animal-based model users, and that of users of both types of models, reported presenting their students both animal and human experimental works. The majority of human-based model users, instead, reported teaching their students only through human experimental work. A whole host of interesting considerations on this marked discrepancy between the 3 groups might be surmised and tested through further surveys, with a view on ascertaining whether it might affect students in their future career<sup>31,32</sup>. Suggestive is also the fact that the development of one's own teaching tools or media was the most common answer (37,7%) among respondents, followed at some distance (21,1%) by the use of tools/media already established in the field or department.

Surveying the participants on continuing education also emerged interesting results. Human-based model users reported a low rate of attendance to workshops or courses compared to animal-based model users. Furthermore, only few human-based researchers attended courses on experimental design improvement, compared to the other two groups. This may be due to a reduced educational portfolio targeting human-based model users. In fact, the knowledge sharing portfolio on new approach methodologies has been only recently updated and augmented, as shown by the EC- JRC<sup>33</sup>.

As to the reasoning behind model choice itself, respondents were adamant on the importance that the chosen model is widespread and established in the scientific community. This overwhelming majority posed high value in working within an established environment with its accepted models and methods, as opposed to performing more exploratory research



relying on less (or not at all) acknowledged models or methods. A common view held by the participants was also that the use of non-peer reviewed models actually hampers the comparison of results among models, with animal-based model users in particular more concerned that the use of such non-peer reviewed models may challenge supervisors engagement and publications output. But, when subjected to a series of questions about still non-peer reviewed models, a majority from all the 3 groups reported that relying on such models might actually increase the chances of breakthrough solutions. Taken together, these three tendencies would seem to return a somewhat paradoxical view of the scientific endeavour, where science thrives on community shared models and methods, and scientific activity potentially suffering when straying from this path, and yet where the use of non-peer reviewed methods (that is, models not yet sanctioned by the community) may actually be the key for breakthrough solutions. This is a quite suggestive outcome. In fact, it could suggest a non-sterile and rather healthy vision of scientific activity, which pursues an out-of-the-box exploration.

Our analysis also highlighted another interesting driver in the selection of experimental models. The majority of the participants stated that animal experiments are a necessary complement to *in vitro/in silico* human-based experiments, to publish in high impact journals or for business exploitation. This outcome may imply the existence of a discrepancy between research activity and its interpretation by editors and the business sector. Especially, users of animal-based models and of both animal- and human-based models declared direct experience of this situation, which was more nuanced for users of human-based models. This result should elicit a series of questions on where exactly the connection between bench and editorial scientists fails. In the case of business exploitation, translational biomedical research is regulated by the European Medicines Agency's (EMA) guidelines usually requiring experimentation in two different animal species. Hence, the pharmaceutical and biomedical sector must provide such evidences, driving translational biomedical researchers to animal-based models. However, EMA is moving also toward the implementation of 3Rs for regulatory testing of medicinal products<sup>34</sup>, which can represent another medium term change in biomedical research.

As previously stated, the dialogue on biomedical research is growing in participation, and consequence. For this reason, the opinion of health and life sciences researchers regarding the participation of several stakeholders in the science policy discussion carries significant

interest. Despite some differences, all three user groups (human, animal, both) had a common view on all the stakeholders, with a positive outlook on almost all of them, suggesting the respondents hold a positive view of this enlarged participation. Of note, all the three groups also agreed on considering as dangerous only a specific stakeholder group, political parties. This is in itself a surprising result, which might merit further investigation in itself, considering the weight political parties carry in translating societal calls into policy. Some very interesting data emerged when the respondents were asked about their outlook on the future of research: a) the majority expected an increase in the scrutiny of research methods/models in grant applications; b) they also expected that the effective benefits and impacts will carry a growing weight; c) lastly, there was a general consensus that national funding will increase for non-animal based methods, but not for animal-based models/methods. Almost independently of the experimental model used, the participants seemed to be clearly aware of a tectonic shift taking place, not yet fully developed, but certainly expected to loom on the horizon.

The researchers' outlook on the policy of science led us straight to one of the cornerstones of the entire European health and life sciences research: Directive 2010/63/EU on the protection of animals used for scientific purposes<sup>2</sup>. We proposed to the participants a convoluted question to register their personal views of the Directive itself, asking their opinion on if, how and to which extent does the Directive acknowledge animal research in the face of equally reliable alternative methods. A majority of the respondents answered that they do not know – an answer for which the authors cannot fully rule out the complex structure of the question. However a reasonable number of respondents appeared convinced that the Directive is not objective toward animal research, because its ultimate aim is to phase out the use of animals in science. This is certainly a result worthy of attention, especially in view of the ongoing debate on the topic, both within the scientific community and externally, and its growing polarization<sup>35-38</sup>.

The growing societal attention to the use of animals in science, and on what conditions might lead to a step-by-step replacement of their use, has been subjected to further investigation. A general agreement was registered among the three groups of users on the need to “fill the knowledge gap” before the use of animals can be made unnecessary, as if the research community still felt the existence of unsatisfactory areas which need improvement.

Researchers using human-based models also saw a need for a cultural change in the scientific

community, an opinion that was not completely shared by animal-based model users. In addition, this latter group did not believe in making courses on new models/methods compulsory as academic and extra-academic courses, whereas those researchers also using human-based models considered this another important measure to move the field forward. It is also important to highlight that the majority of researchers agreed on the need to perform an accurate analysis of drawbacks and potential risks for each sector, before a transition away from animals can be finalized. This call by researchers to perform a specific analysis for each sector of health and life sciences points out the presence of unignorable differences in the perception of the state of the art of each branch of the health and life sciences, which can hinder the transition to a non-animal experimental research. On this specific issue, the reports in different disease areas on human-based methods and models, published by the EC-JRC, have shown a large difference in the proportion of use of human-based models depending on the biomedical research field<sup>39-42</sup>, reinforcing with evidences the perceived differences in the state of the art of the biomedical research fields in implementing human-based models/methods, we registered in this study.

In conclusion, notwithstanding the modest cohort of researchers that participated in our survey, this study established solid pillars on which future investigations can build to appraise specific social aspects of the health and life sciences research community. We invite other researchers and stakeholders to avail themselves of the analyses and conclusions contained in this study as a possible means to bridge some of the critical communicational and interpretational gaps between the scientific community and society at large, so to better frame and further the essential debate on the governance of health and life sciences research<sup>43</sup>. The communication gap between the professionals of science and the other interested parties is certainly playing a role in hampering a healthier and more inclusive debate on the future of biomedical research, through an often unspoken yet subtly detrimental bias.

## ACKNOWLEDGMENTS

We would like to thank scientific, industry and regulatory experts for their feedback and review during the questionnaire drafting, among others Drs. Michele Signore, Sabrina Tait (ISS); Adelaide Dura and Marlies Halder (EC-JRC), Claudia Cicone (Campus Biomedico di Roma), Shahjahan Shaid (GSK). We also would like to thank Drs. Sofia Batita Leite, Ivana Campia, Adelaide Dura and Marcelle Holloway for their critical review of the manuscript. This study was financially supported by Eurogroup for Animals, Belgium. L.D.P., L.V. and M.S. designed the questionnaire, distributed and drafted the manuscript. M.S. coordinated the study and analysed the results. All authors critically revised and approved the final manuscript. The authors declare no financial competing interests.

## CONFLICT OF INTERESTS

L.D.P. and L.V. were employed as consultants by SCIENCE&STRATEGY SL. M.S. is employed as CEO by the company SCIENCE&STRATEGY SL. FRESCI is a registered trademark of SCIENCE&STRATEGY SL.

## REFERENCES

1. European Parliament resolution of 16 September 2021 on plans and actions to accelerate the transition to innovation without the use of animals in research, regulatory testing and education (2021/2784(RSP); P9\_TA(2021)0387.
2. Directive 2010/63/EU of the European Parliament and of the Council of 22 September 2010 on the protection of animals used for scientific purposes, [2010], OJ L 276/33.
3. Regulation (EC) No 1223/2009 of the European Parliament and of the Council of 30 November 2009 on cosmetic products (recast), [2009], OJ L 342, p. 59.
4. [https://ec.europa.eu/environment/chemicals/lab\\_animals/alures\\_en.htm](https://ec.europa.eu/environment/chemicals/lab_animals/alures_en.htm)
5. Regulation (EU) 2019/1010 of the European Parliament and of the Council of 5 June 2019 on the alignment of reporting obligations in the field of legislation related to the environment, and amending Regulations (EC) No 166/2006 and (EU) No 995/2010 of the European Parliament and of the Council, Directives 2002/49/EC, 2004/35/EC, 2007/2/EC, 2009/147/EC and 2010/63/EU of the European Parliament and of the Council, Council Regulations (EC) No 338/97 and (EC) No 2173/2005, and Council Directive 86/278/EEC (Text with EEA relevance).
6. [https://ec.europa.eu/environment/chemicals/lab\\_animals/pdf/SWD\\_part\\_A\\_and\\_B.pdf](https://ec.europa.eu/environment/chemicals/lab_animals/pdf/SWD_part_A_and_B.pdf)
7. Commission staff working document - Summary Report on the statistics on the use of animals for scientific purposes in the Member States of the European Union and Norway in 2018, SWD(2021) 204 final.
8. Hay, M., Thomas, D., Craighead, J. et al. Clinical development success rates for investigational drugs. Nat Biotechnol 32, 40–51 (2014). <https://doi.org/10.1038/nbt.2786>
9. Pound, P., Ritskes-Hoitinga, M. Is it possible to overcome issues of external validity in preclinical animal research? Why most animal models are bound to fail. J Transl Med 16, 304 (2018). <https://doi.org/10.1186/s12967-018-1678-1>

10. Leenaars, C.H.C., Kouwenaar, C., Stafleu, F.R. et al. Animal to human translation: a systematic scoping review of reported concordance rates. *J Transl Med* 17, 223 (2019).  
<https://doi.org/10.1186/s12967-019-1976-2>
11. Bracken MB. Why animal studies are often poor predictors of human reactions to exposure. *Journal of the Royal Society of Medicine*. 2009;102(3):120-122.  
<https://doi.org/10.1258/jrsm.2008.08k033>
12. COMMUNICATION FROM THE COMMISSION on the European Citizens' Initiative "Stop Vivisection". Brussels, 3.6.2015; C(2015) 3773 final.
13. Vanessa Zainzinger. EU citizens' initiative urges stronger animal testing ban for cosmetics. *Chemical Watch*, 2.9.2021
14. <https://www.basel-declaration.org>
15. Abbott, A. Basel Declaration defends animal research. *Nature* 468, 742 (2010).  
<https://doi.org/10.1038/468742a>
16. <https://www.leru.org/>
17. <https://animalresearchtomorrow.org/en>
18. <https://www.eurogroupforanimals.org/>
19. <https://www.animalwelfareintergroup.eu>
20. Joffe, A.R., Bara, M., Anton, N. et al. The ethics of animal research: a survey of the public and scientists in North America. *BMC Med Ethics* 17, 17 (2016).  
<https://doi.org/10.1186/s12910-016-0100-x>
21. Save cruelty free cosmetics – Commit to Europe without animal testing.  
ECI(2021)000006 [https://europa.eu/citizens-initiative/initiatives/details/2021/000006\\_en](https://europa.eu/citizens-initiative/initiatives/details/2021/000006_en)
22. Langley GR, Adcock IM, Busquet F, et al., Towards a 21st-century roadmap for biomedical research and drug discovery: consensus report and recommendations. *Drug*

- Discov Today. 2017 Feb;22(2):327-339. doi: 10.1016/j.drudis.2016.10.011. Epub 2016 Oct 29. PMID: 27989722.
23. Genzel L, Adan R, Berns A, et al. How the COVID-19 pandemic highlights the necessity of animal research [published correction appears in Curr Biol. 2020 Nov 2;30(21):4328]. Curr Biol. 2020;30(18):R1014-R1018. doi:10.1016/j.cub.2020.08.030
  24. Carusi A., Whelan M. and Wittwehr C., Bridging Across Methods in the Biosciences – BeAMS, EUR 29852 EN, Publications Office of the European Union, Luxembourg, 2019, ISBN 978-92-76-11181-8, doi:10.2760/190697, JRC116305
  25. [https://ec.europa.eu/environment/chemicals/lab\\_animals/index\\_en.htm](https://ec.europa.eu/environment/chemicals/lab_animals/index_en.htm)
  26. Zuang, V., Dura, A., et al., Non-animal Methods in Science and Regulation - EURL ECVAM Status Report 2020, EUR 30553 EN, Publications Office of the European Union, Luxembourg, 2021, ISBN 978-92-76-28395-9, doi:10.2760/719755, JRC123531.
  27. Viegas Barroso, J.F., Halder, M.E. and Whelan, M., EURL ECVAM Recommendation on Non-Animal-Derived Antibodies, EUR 30185 EN, Publications Office of the European Union, Luxembourg, 2020, ISBN 978-92-76-18347-1, doi:10.2760/091625, JRC120199.
  28. <https://ec.europa.eu/eusurvey/runner/ExperimentalModelsInResearchFRESCI2020>
  29. <https://euraxess.ec.europa.eu/europe/career-development/training-researchers/research-profiles-descriptors>
  30. <https://www.maastrichtuniversity.nl/will-netherlands-ever-be-free-animal-testing>
  31. Zemanova MA, Knight A. The Educational Efficacy of Humane Teaching Methods: A Systematic Review of the Evidence. Animals. 2021; 11(1):114. <https://doi.org/10.3390/ani11010114>
  32. Shibayama S. Sustainable development of science and scientists: Academic training in life science labs. Research Policy 2019; 48(3): 676-92. <https://doi.org/10.1016/j.respol.2018.10.030>



33. <https://ec.europa.eu/jrc/en/eurl/ecvam/knowledge-sharing-3rs/education-and-training>
34. Reflection paper providing an overview of the current regulatory testing requirements for medicinal products for human use and opportunities for implementation of the 3Rs. Committee for Medicinal Products for Human Use (CHMP); EMA/CHMP/CVMP/3Rs/742466/2015; [18 October 2018].
35. Hobson-West P. The role of public opinion in the UK animal research debate. *J. Med. Ethics.* 2010;36:46–49. doi: 10.1136/jme.2009.030817.
36. Franco NH. Animal Experiments in Biomedical Research: A Historical Perspective. *Animals.* 2013; 3(1):238-273. <https://doi.org/10.3390/ani3010238>
37. Pew Research Center, Aug. 2018, “Most Americans Accept Genetic Engineering of Animals That Benefits Human Health, but Many Oppose Other Uses”
38. Germain P-L, Chiapperino L, Testa G. The European politics of animal experimentation: From Victorian Britain to ‘Stop Vivisection.’ *Stud Hist Philos Sci Part C Stud Hist Philos Biol Biomed Sci.* 2017;64: 75–87. 10.1016/j.shpsc.2017.06.004
39. Witters, H., Verstraelen, S., Aerts, L., Miccoli, B., Delahanty, A., Gribaldo L., Advanced Non-animal Models in Biomedical Research – Neurodegenerative Diseases, EUR 30334 EN, Publications Office of the European Union, Luxembourg, 2021, ISBN 978-92-76-35944-9, doi:10.2760/386, JRC124723.
40. Hynes, J., Marshall, L., Adcock, I., Novotny, T., Nic, M., Dibusz, K., Gribaldo, L. and Whelan, M., Advanced Non-animal Models in Biomedical Research, EUR 30334 EN, Publications Office of the European Union, Luxembourg, 2020, ISBN 978-92-76-21381-9, doi:10.2760/52671, JRC118161.
41. Folgiero, V., Romania, P., Rossi, F., Caforio, M., Nic, M., Dibusz, K., Novotny, T., Busquet, F., Straccia, M. and Gribaldo, L., Advanced Non-animal Models in Biomedical Research: Breast Cancer, EUR 30334/1 EN, Publications Office of the European Union, Luxembourg, 2020, ISBN 978-92-76-24689-3, doi:10.2760/618741, JRC122309.



42. Romania, P., Folgiero, V., Nic, M., Dibusz, K., Novotny, T., Busquet, F., Rossi, F., Straccia, M., Daskalopoulos, E. P., and Gribaldo, L., Advanced Non-animal Models in Biomedical Research: Immuno-oncology, EUR 30334/3 EN, Publications Office of the European Union, Luxembourg, 2021, ISBN 978-92-76-39986-5, doi:10.2760/393670, JRC125256.
43. Lyall, C & Tait, J 2019, 'Beyond the limits to governance: New rules of engagement for the tentative governance of the life sciences', Research Policy, vol. 48, no. 5, pp. 1128-1137. <https://doi.org/10.1016/j.respol.2019.01.009>

## FIGURE LEGENDS

### Figure 1

Population pyramid of participants, with 56 males (red) and 59 females (blue) grouped in six range of age.

### Figure 2

The percentage of participants organisation type is shown. In blue were represented participants with one affiliation only and in red those participants with more than one affiliation.

### Figure 3

“How did you choose or establish your main experimental model?”. The stacked bar chart shows the frequency of each answer segmented by the researcher use of animal- (yellow) or human-based (blue) or both models (turquoise).

### Figure 4

Participants were asked to rate the following statements regarding the use of models. Rating scale was from 1 (red) to 5 (green) stars. Histogram dimensions are represented as 100%, where 100% is the total number of participants of each subgroup: human- (39), animal-based (30) and both (44) model users. The stacked chart, calibrated around the neutral score (3 stars), shows the number of respondents based on their degree of agreement and segmented by researchers use of animal- or human-based or both models.

### Figure 5

“If you had the need to use a still non-peer reviewed model or method, how would you rate the following concerns and benefits?”. Participants were asked to rate the following statements regarding concerns and benefits of use non-peer reviewed models. Rating scale was from 1 (red) to 5 (dark green) stars. Histogram dimensions are represented as 100%, where 100% is the total number of participants of each subgroup: human- (39), animal-based (30) and both (44) model users. The stacked chart, calibrated around the neutral score (3 stars), shows the number of respondents based on their degree of agreement and segmented by researchers use of animal- or human-based or both models.

## Figure 6

“In your opinion, in order to publish in high-impact factor journals or for business exploitation (industry licensing, etc.) are animal experiments necessary to complement in vitro /in silico human based experimental models?”. The pie charts show the number of respondents answering “Yes” (blue) and “No” (red) segmented by researchers use of animal- (shades of yellow) or human-based (shades of blue) or both models (shades of turquoise).

## Figure 7

“Did you have any direct experience?” This chart is linked to the previous question “In your opinion, in order to publish in high-impact factor journals or for business exploitation (industry licensing, etc.) are animal experiments necessary to complement in vitro /in silico human based experimental models?”. The pie charts show the number of respondents answering “Yes” (blue) and “No” (red) segmented by researchers use of animal- (shades of yellow) or human-based (shades of blue) or both models (shades of turquoise).

## Figure 8

Participants were asked to rate the following statements regarding funding opportunities. Rating scale was from 1 (red) to 5 (green) stars. Histogram dimensions are represented as 100%, where 100% is the total number of participants of each subgroup: human- (39), animal-based (30) and both (44) model users. The stacked chart, calibrated around the neutral score (3 stars), shows the number of respondents based on their degree of agreement and segmented by researchers use of animal- or human-based or both models.

## Figure 9

“In your teaching activity, are you mostly presenting human or animal experimental works?”. The pie charts show the number of respondents answering regarding their teaching of experimental work. Each pie represents the answers for each group of researchers (animal-based, human-based models or both models users).

## Figure 10

“Have you ever attended any workshop/course on ...?”. The bar chart represents the distribution of answers regarding continuing education topic reported by each Euraxess

research profile (the bar chart is normalised to the total answers per group: R1=39, R2=57, R3=58, R4=45).

### Figure 11

“Have you ever attended any workshop/course on...?”. The bar chart represents the distribution of answers regarding continuing education topic reported by type of model users (the bar chart is normalised to the total answers per group of model users: animal-based models=60, human-based models=48, both models=84).

### Figure 12

“What is your opinion on the participation of the following organisations in the scientific and political debates regarding the orientation of research?”. The stacked chart, calibrated around the neutral answers, shows the number of respondents based on their opinion from “Dangerous” (in red) to “Useful” (in dark green) and segmented by researchers use of animal- or human-based or both models. Histogram dimensions are represented as 100%, where 100% is the total number of participants of each subgroup: human- (39), animal-based (30) and both (44) model users.

### Figure 13

“Animal-based research should be phased out only if ...”. Participants were asked to rate the following statements regarding the gaps or barriers to overcome for phasing-out animal experimentation. Rating scale was from 1 (red) to 5 (dark green) stars. Histogram dimensions are represented as 100%, where 100% is the total number of participants of each subgroup: human- (39), animal-based (30) and both (44) model users. The stacked chart, calibrated around the neutral score (in grey, 3 stars), shows the number of respondents based on their degree of agreement and segmented by researchers use of animal- or human-based or both models.

## **SUPPLEMENTARY FIGURES**

### **Supplementary Figure 1**

Geographical location of the participants working place in Europe.

### **Supplementary Figure 2**

”How did you choose or establish your main teaching tool/media?”. The bar chart shows the methods used by respondents to choose or establish their teaching media.

### **Supplementary Figure 3**

“If an animal model and a new non-animal model provide comparable results, do you think the Directive 2010/63/EU acknowledges adequately the animal model by virtue of its well known, predictable, widely used and established?” Answers were segmented by the involvement (dark blue) or not (red) of respondents in regulatory science projects.

## TABLES

**Table 1:** “If an animal model and a new non-animal model provide comparable results, do you think the Directive 2010/63/EU acknowledges adequately the animal model by virtue of its being well known, predictable, widely used and established?” Data presented in Figure 24 are here shown as percentage of participants segmented by Euraxess research profile to provide a normalized view of results view.

| Group                                                                                                   | R1               | R2               | R3               | R4               |
|---------------------------------------------------------------------------------------------------------|------------------|------------------|------------------|------------------|
| Poorly, because its aim is that of phasing out animal research, so it can't be fully objective.         | -                | 19,4%            | 18,4%            | 7,7%             |
| Significantly, because the Directive acknowledges the currently irreplaceable value of animal research  | 13,6%            | 12,9%            | 7,9%             | 26,9%            |
| No, because the Directive requires the use of alternative methods and techniques if they are available. | 22,7%            | 29,0%            | 18,4%            | 23,1%            |
| I don't know.                                                                                           | 63,6%            | 38,7%            | 55,3%            | 42,3%            |
| <b>TOTAL</b>                                                                                            | <b>100% (24)</b> | <b>100% (42)</b> | <b>100% (51)</b> | <b>100% (26)</b> |

**Table 1:** “If an animal model and a new non-animal model provide comparable results, do you think the Directive 2010/63/EU acknowledges adequately the animal model by virtue of its well known, predictable, widely used and established?” Data presented in Figure 25 are here shown as percentage of participants segmented by type of model users to provide a normalized view of results view.

| Group                                                                                                   | Animal-based model users | Human-based model users | Both             |
|---------------------------------------------------------------------------------------------------------|--------------------------|-------------------------|------------------|
| Poorly, because its aim is that of phasing out animal research, so it can't be fully objective.         | 20,0%                    | 12,8%                   | 9,1%             |
| Significantly, because the Directive acknowledges the currently irreplaceable value of animal research  | 10,0%                    | 12,8%                   | 18,2%            |
| No, because the Directive requires the use of alternative methods and techniques if they are available. | 16,7%                    | 30,8%                   | 20,4%            |
| I don't know.                                                                                           | 53,3%                    | 43,6%                   | 52,3%            |
| <b>TOTAL</b>                                                                                            | <b>100% (30)</b>         | <b>100% (39)</b>        | <b>100% (44)</b> |

## SUPPLEMENTARY TABLE 1

**Legend:** Other international surveys in the Three Rs field or among researchers are shown.

| Survey Name                                                                                  | Organizer  | Participants | Year |
|----------------------------------------------------------------------------------------------|------------|--------------|------|
| Scientific methodologies for the assessment of combined effects of chemicals.                | JRC        | 58           | 2015 |
| 3Rs knowledge sharing.                                                                       | JRC        | 351          | 2017 |
| Biologically based mathematical models in toxicology: current use and regulatory acceptance. | JRC        | 93           | 2017 |
| Establishing the scientific validity of complex in vitro models.                             | JRC        | 646          | 2018 |
| A survey on Monitoring Innovation and Societal Impact of EU-funded Research.                 | JRC        | 202          | 2020 |
| Non-animal derived antibodies.                                                               | EARA/EFPIA | 133          | 2020 |
| Publication Bias.                                                                            | HSI/PCRM   | 90           | 2021 |
| Biologicals Manufacturers 3Rs implementation.                                                | NC3Rs      | 28           | 2021 |
| <b>Average</b>                                                                               |            | 200          |      |
| <b>SD</b>                                                                                    |            | 207          |      |
| <b>MEDIAN</b>                                                                                |            | 113          |      |



## SUPPLEMENTARY TABLE 2

**Legend:** Health and Life science research fields of the survey participants.

| RESEARCH FIELD         | %     |
|------------------------|-------|
| NEUROSCIENCE           | 15,6% |
| TOXICOLOGY             | 9,9%  |
| ONCOLOGY               | 5,7%  |
| BIOMEDICINE            | 5,0%  |
| REGENERATIVE_MEDICINE  | 4,3%  |
| DRUG_DEVELOPMENT       | 3,5%  |
| IMMUNOLOGY             | 3,5%  |
| PULMONOLOGY            | 3,5%  |
| DEVELOPMENTAL_BIOLOGY  | 2,1%  |
| MICROBIOLOGY           | 2,1%  |
| NEPHROLOGY             | 2,1%  |
| STEM_CELL_BIOLOGY      | 2,1%  |
| VIROLOGY               | 2,1%  |
| CARDIOLOGY             | 2,1%  |
| BIOCHEMISTRY           | 1,4%  |
| BIOMATERIALS           | 1,4%  |
| BIOMEDICAL_ENGINEERING | 1,4%  |
| CELL_BIOLOGY           | 1,4%  |
| PHARMACOLOGY           | 1,4%  |
| PHYSIOLOGY             | 1,4%  |
| VETERINARY             | 1,4%  |
| ANIMALS_WELFARE        | 1,4%  |
| BIO-ENGINEERING        | 1,4%  |
| LIFE_SCIENCES          | 1,4%  |
| ORGAN-ON-CHIP          | 1,4%  |
| 3RS                    | 0,7%  |
| ANALYTICAL_BIOSCIENCES | 0,7%  |
| AUTOIMMUNITY           | 0,7%  |

|                           |      |
|---------------------------|------|
| BIOFABRICATION            | 0,7% |
| BIOLOGY_OF_REPRODUCTION   | 0,7% |
| BIOPHYSICS                | 0,7% |
| BIOTECHNOLOGY             | 0,7% |
| CHRONIC_PAIN              | 0,7% |
| COMPUTATIONAL             | 0,7% |
| DERMATOLOGY               | 0,7% |
| FISH_BIOLOGY              | 0,7% |
| GASTROENTEROLOGY          | 0,7% |
| GENETICS                  | 0,7% |
| HYPERTENSION              | 0,7% |
| INFLAMMATION              | 0,7% |
| INFLAMMATORY_SKIN_DISEASE | 0,7% |
| MATHEMATICS               | 0,7% |
| METEBOLOMICS              | 0,7% |
| MICROFLUIDICS             | 0,7% |
| MOLECULAR                 | 0,7% |
| NANOMEDICINE              | 0,7% |
| NON-INVASIVE_IMAGING      | 0,7% |
| NUMERICAL_ANALYSIS        | 0,7% |
| ORGAN_FIBROSIS            | 0,7% |
| ORTHOPEDICS               | 0,7% |
| REGULATORY                | 0,7% |
| SYSTEM_BIOLOGY            | 0,7% |
| VALIDATION                | 0,7% |
| VASCULAR_SURGERY          | 0,7% |

# SUPPLEMENTARY MATERIAL

List of questions and response choices provided:

|    |                                                                                                                                                   |
|----|---------------------------------------------------------------------------------------------------------------------------------------------------|
| 1  | Name                                                                                                                                              |
| 2  | Surname                                                                                                                                           |
| 3  | Email                                                                                                                                             |
| 4  | Phone                                                                                                                                             |
| 5  | Age                                                                                                                                               |
| 6  | Gender                                                                                                                                            |
|    | Please specify                                                                                                                                    |
| 7  | Nationality                                                                                                                                       |
| 8  | Main country of work                                                                                                                              |
| 9  | What kind of organisation do you work for?                                                                                                        |
|    | Please specify                                                                                                                                    |
| 10 | Please select the option that best describes your role within your organisation.                                                                  |
|    | Please specify                                                                                                                                    |
| 11 | Research field                                                                                                                                    |
| 12 | Are you involved in a regulatory science project?                                                                                                 |
| 13 | Are you engaged in teaching activities in your organization?                                                                                      |
| 14 | Do you use animal or human models/samples/data?: Animal-based                                                                                     |
|    | Do you use animal or human models/samples/data?: Human-based                                                                                      |
|    | Do you use animal or human models/samples/data?: Both                                                                                             |
|    | Do you use animal or human models/samples/data?: Other (Please specify below)                                                                     |
|    | Please specify                                                                                                                                    |
| 15 | Is your model genetic engineered?                                                                                                                 |
| 16 | What kind of model do you usually work with in your routine research activities?                                                                  |
|    | Please specify                                                                                                                                    |
| 17 | How did you choose or establish your main experimental model?                                                                                     |
|    | Please specify                                                                                                                                    |
| 18 | Please rate the following statements:: The model I am using has been standardised/qualified or regulatory validated.                              |
|    | Please rate the following statements:: The model I am using is affordable for my organization, and/or I have access to good structures to use it. |
|    | Please rate the following statements:: I have access to results of previous studies that used the same model that I am using.                     |
|    | Please rate the following statements:: The model I am using was part of my educational curriculum.                                                |

TITLE: Researchers and their experimental models: A European survey perspective on the future EU action plan to end the use of animals in research.

|           |                                                                                                                                                                                                                                              |
|-----------|----------------------------------------------------------------------------------------------------------------------------------------------------------------------------------------------------------------------------------------------|
|           | Please rate the following statements:: I collaborate with other groups and researchers using or further developing the same experimental model I am working with.                                                                            |
|           | Please rate the following statements:: I know of other models relevant to my work, but I don't have access to them.                                                                                                                          |
| <b>19</b> | What is your opinion on the participation of the following organizations in the scientific and political debates regarding the orientation of research:: Research foundations                                                                |
|           | What is your opinion on the participation of the following organizations in the scientific and political debates regarding the orientation of research:: Animal research NGOs                                                                |
|           | What is your opinion on the participation of the following organizations in the scientific and political debates regarding the orientation of research:: Animal protection NGOs                                                              |
|           | What is your opinion on the participation of the following organizations in the scientific and political debates regarding the orientation of research:: Other research NGOs                                                                 |
|           | What is your opinion on the participation of the following organizations in the scientific and political debates regarding the orientation of research:: Patients associations                                                               |
|           | What is your opinion on the participation of the following organizations in the scientific and political debates regarding the orientation of research:: Regulators                                                                          |
|           | What is your opinion on the participation of the following organizations in the scientific and political debates regarding the orientation of research:: Policy makers                                                                       |
|           | What is your opinion on the participation of the following organizations in the scientific and political debates regarding the orientation of research:: Political parties                                                                   |
|           | What is your opinion on the participation of the following organizations in the scientific and political debates regarding the orientation of research:: Pharmaceutical associations                                                         |
|           | What is your opinion on the participation of the following organizations in the scientific and political debates regarding the orientation of research:: Other industry associations                                                         |
|           | What is your opinion on the participation of the following organizations in the scientific and political debates regarding the orientation of research:: Other (please specify below)                                                        |
|           | Please specify the type of organization:                                                                                                                                                                                                     |
| <b>20</b> | Please rate the following statements:: I am positive I will have increased funding opportunities in my research field                                                                                                                        |
|           | Please rate the following statements:: The applications and limitations of research methods/models will be further scrutinised in grant applications                                                                                         |
|           | Please rate the following statements:: More national funding will be directed to non-animal methods in the mid-term                                                                                                                          |
|           | Please rate the following statements:: More national funding will be directed to animal-based methods in the mid-term                                                                                                                        |
|           | Please rate the following statements:: Calls for projects will increasingly incentivise integration of different disciplines and methods                                                                                                     |
|           | Please rate the following statements:: Calls for projects will increasingly incentivise strategies to translate research results into societal impact.                                                                                       |
| <b>21</b> | How important is it for your work that your chosen model is widespread and established in the scientific community at large?                                                                                                                 |
| <b>22</b> | If you had the need to use a still not peer-reviewed model or method, how would you rate the following concerns and benefits?: Difficulty in comparing results among models.                                                                 |
|           | If you had the need to use a still not peer-reviewed model or method, how would you rate the following concerns and benefits?: Difficulty in publishing your research.                                                                       |
|           | If you had the need to use a still not peer-reviewed model or method, how would you rate the following concerns and benefits?: Difficulty in engaging superiors/supervisors.                                                                 |
|           | If you had the need to use a still not peer-reviewed model or method, how would you rate the following concerns and benefits?: Increased the probability of breakthrough solutions.                                                          |
|           | If you had the need to use a still not peer-reviewed model or method, how would you rate the following concerns and benefits?: Chance to access new funding opportunities (different funding programs, different donor organizations, etc.). |

TITLE: Researchers and their experimental models: A European survey perspective on the future EU action plan to end the use of animals in research.

|           |                                                                                                                                                                                                                                                                                                                                                                                                                                                                                                                                                                                                                                                                                                                                                                                                                                                                                                                                                                                                                         |
|-----------|-------------------------------------------------------------------------------------------------------------------------------------------------------------------------------------------------------------------------------------------------------------------------------------------------------------------------------------------------------------------------------------------------------------------------------------------------------------------------------------------------------------------------------------------------------------------------------------------------------------------------------------------------------------------------------------------------------------------------------------------------------------------------------------------------------------------------------------------------------------------------------------------------------------------------------------------------------------------------------------------------------------------------|
|           | If you had the need to use a still not peer-reviewed model or method, how would you rate the following concerns and benefits?: Difficulty in using or accessing new equipment.                                                                                                                                                                                                                                                                                                                                                                                                                                                                                                                                                                                                                                                                                                                                                                                                                                          |
|           | Please specify                                                                                                                                                                                                                                                                                                                                                                                                                                                                                                                                                                                                                                                                                                                                                                                                                                                                                                                                                                                                          |
| <b>23</b> | In your opinion, in order to publish in high-impact factor journals or for business exploitation (industry licencing, etc.), are animal experiments necessary to complement in vitro/in silico human-based experimental models?                                                                                                                                                                                                                                                                                                                                                                                                                                                                                                                                                                                                                                                                                                                                                                                         |
| <b>24</b> | Did you have any direct experience?                                                                                                                                                                                                                                                                                                                                                                                                                                                                                                                                                                                                                                                                                                                                                                                                                                                                                                                                                                                     |
| <b>25</b> | In your teaching activity, are you mostly presenting human or animal-based experimental works?<br>Please specify                                                                                                                                                                                                                                                                                                                                                                                                                                                                                                                                                                                                                                                                                                                                                                                                                                                                                                        |
| <b>26</b> | What teaching media do you use, and which one(s) do you prefer?: Live Animals<br>What teaching media do you use, and which one(s) do you prefer?: Cadavers<br>What teaching media do you use, and which one(s) do you prefer?: Anatomical Parts Models<br>What teaching media do you use, and which one(s) do you prefer?: Full Body Simulators<br>What teaching media do you use, and which one(s) do you prefer?: Screen-based Simulators<br>What teaching media do you use, and which one(s) do you prefer?: Virtual Reality<br>What teaching media do you use, and which one(s) do you prefer?: Actor-based Simulations<br>What teaching media do you use, and which one(s) do you prefer?: Other In silico (Please specify below)<br>What teaching media do you use, and which one(s) do you prefer?: In vitro (Please specify below)<br>What teaching media do you use, and which one(s) do you prefer?: Other (Please specify below)<br>Please specify                                                           |
| <b>27</b> | How did you choose or establish your main teaching tool/media?<br>Please specify                                                                                                                                                                                                                                                                                                                                                                                                                                                                                                                                                                                                                                                                                                                                                                                                                                                                                                                                        |
| <b>28</b> | Have you ever attended any workshops/course on...?                                                                                                                                                                                                                                                                                                                                                                                                                                                                                                                                                                                                                                                                                                                                                                                                                                                                                                                                                                      |
| <b>29</b> | Please specify the course title and training entity                                                                                                                                                                                                                                                                                                                                                                                                                                                                                                                                                                                                                                                                                                                                                                                                                                                                                                                                                                     |
| <b>30</b> | If an animal model and a new non-animal model provide comparable results, do you think the Directive 2010/63/EU acknowledges adequately the animal model by virtue of its being well known, predictable, widely used and established?                                                                                                                                                                                                                                                                                                                                                                                                                                                                                                                                                                                                                                                                                                                                                                                   |
| <b>31</b> | Please rate the following statements: Animal-based research should be phased-out only if ... we fill the knowledge gap.<br>Please rate the following statements: Animal-based research should be phased-out only if ... a cultural change takes place in the scientific community.<br>Please rate the following statements: Animal-based research should be phased-out only if ... there is a concrete regulatory support.<br>Please rate the following statements: Animal-based research should be phased-out only if ... there is a wider collaboration between researchers, industry, NGOs, policy makers and regulators.<br>Please rate the following statements: Animal-based research should be phased-out only if ... drawbacks for each research field are identified and used for a risk analysis.<br>Please rate the following statements: Animal-based research should be phased-out only if ... academic and extra-academic courses on the use of new methods/models are made compulsory.<br>Please specify |

Corresponding author: Dr. Marco Straccia, PhD MBA, marco.straccia@fre-sci.com

TITLE: Researchers and their experimental models: A European survey perspective on the future EU action plan to end the use of animals in research.

|    |                                                                                                                                                                                             |
|----|---------------------------------------------------------------------------------------------------------------------------------------------------------------------------------------------|
| 32 | Would you consider to connect on a shared open-data virtual platform with peers to develop, characterise, validate and share knowledge on new methods and/or models in your research field? |
|----|---------------------------------------------------------------------------------------------------------------------------------------------------------------------------------------------|

Corresponding author: Dr. Marco Straccia, PhD MBA, marco.straccia@fre-sci.com

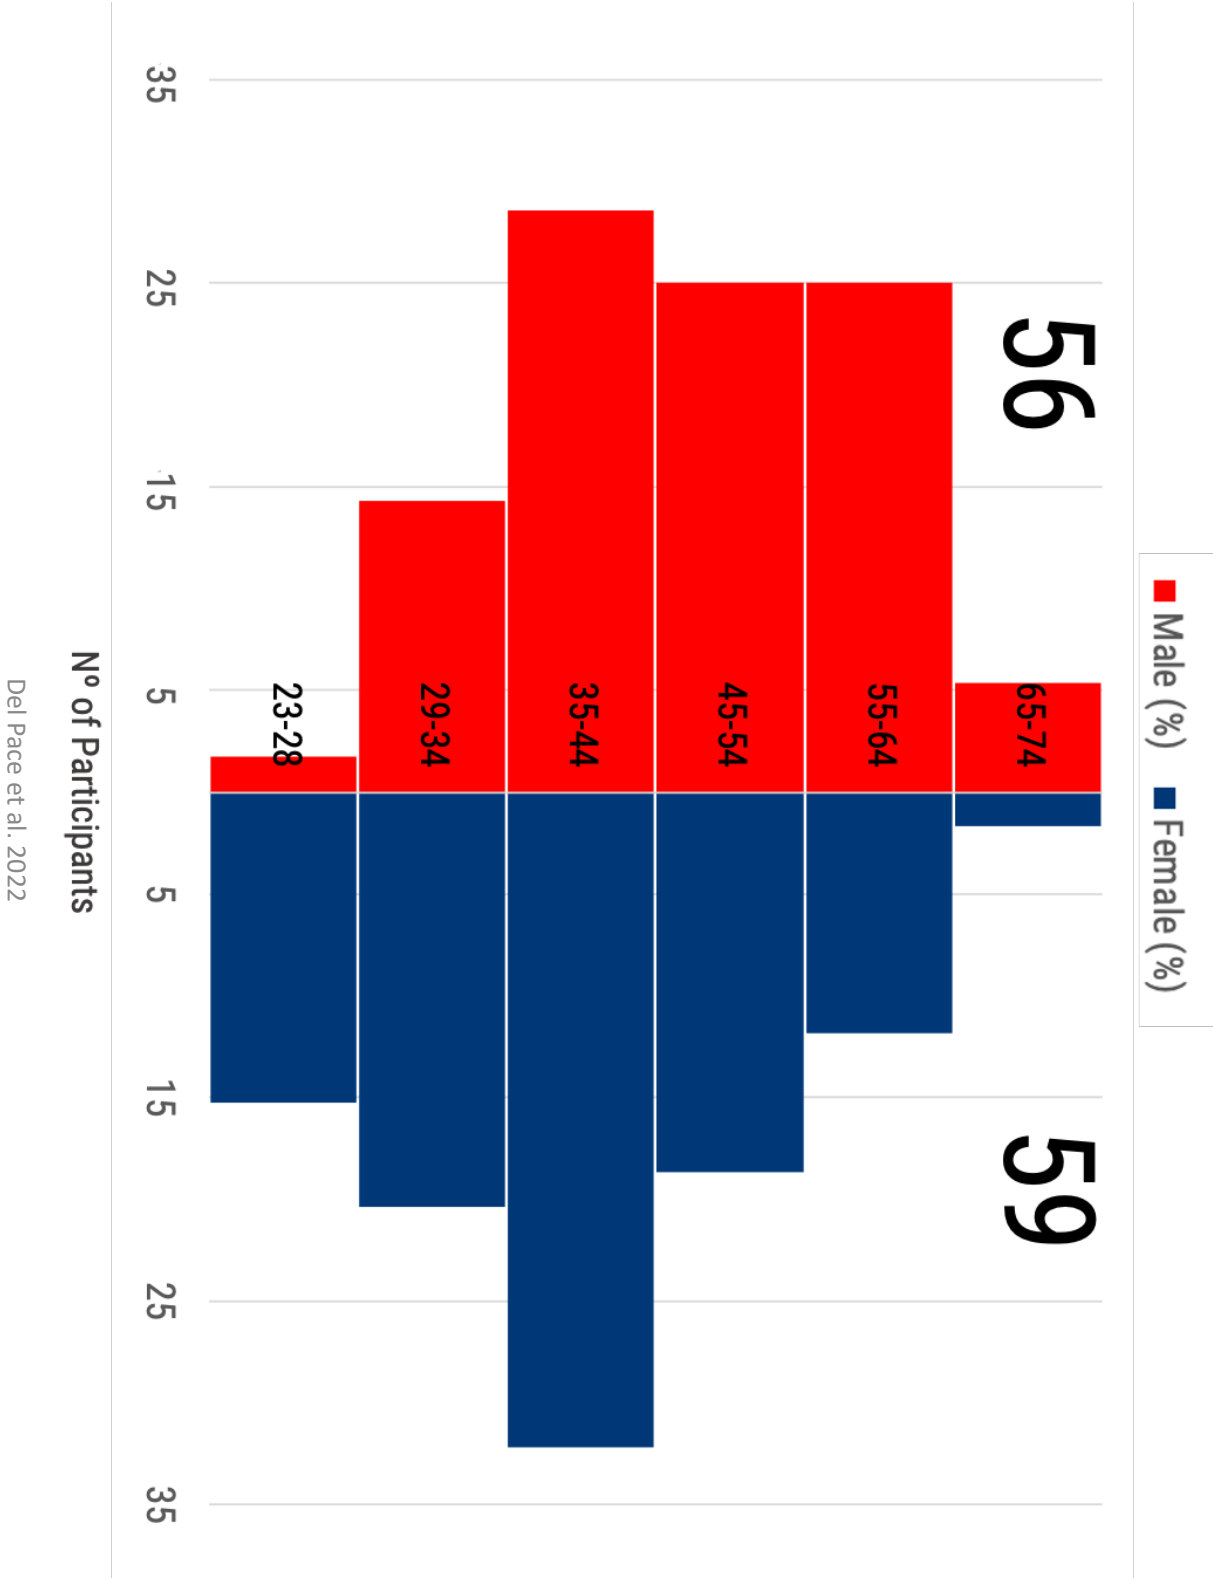

Figure 1



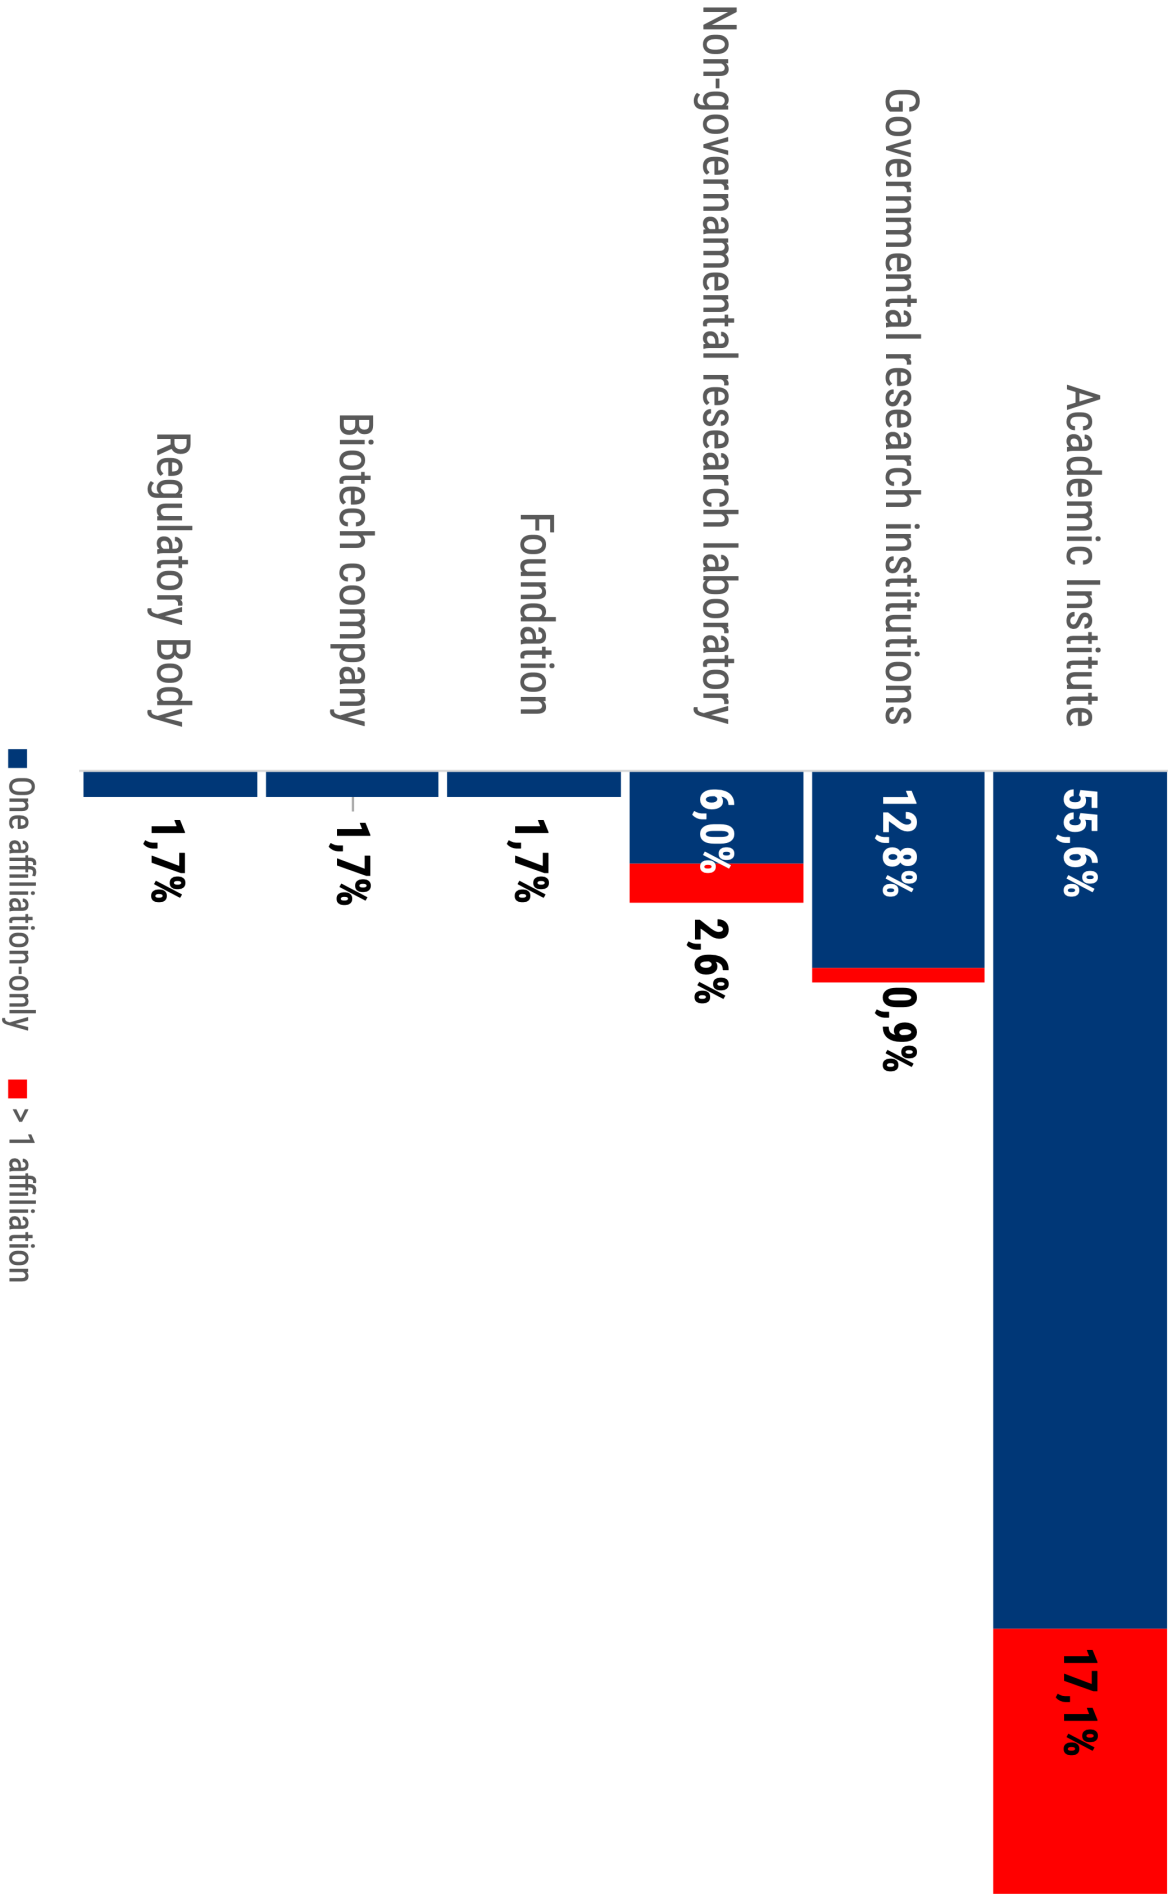

Del Pace et al. 2022

Figure 2

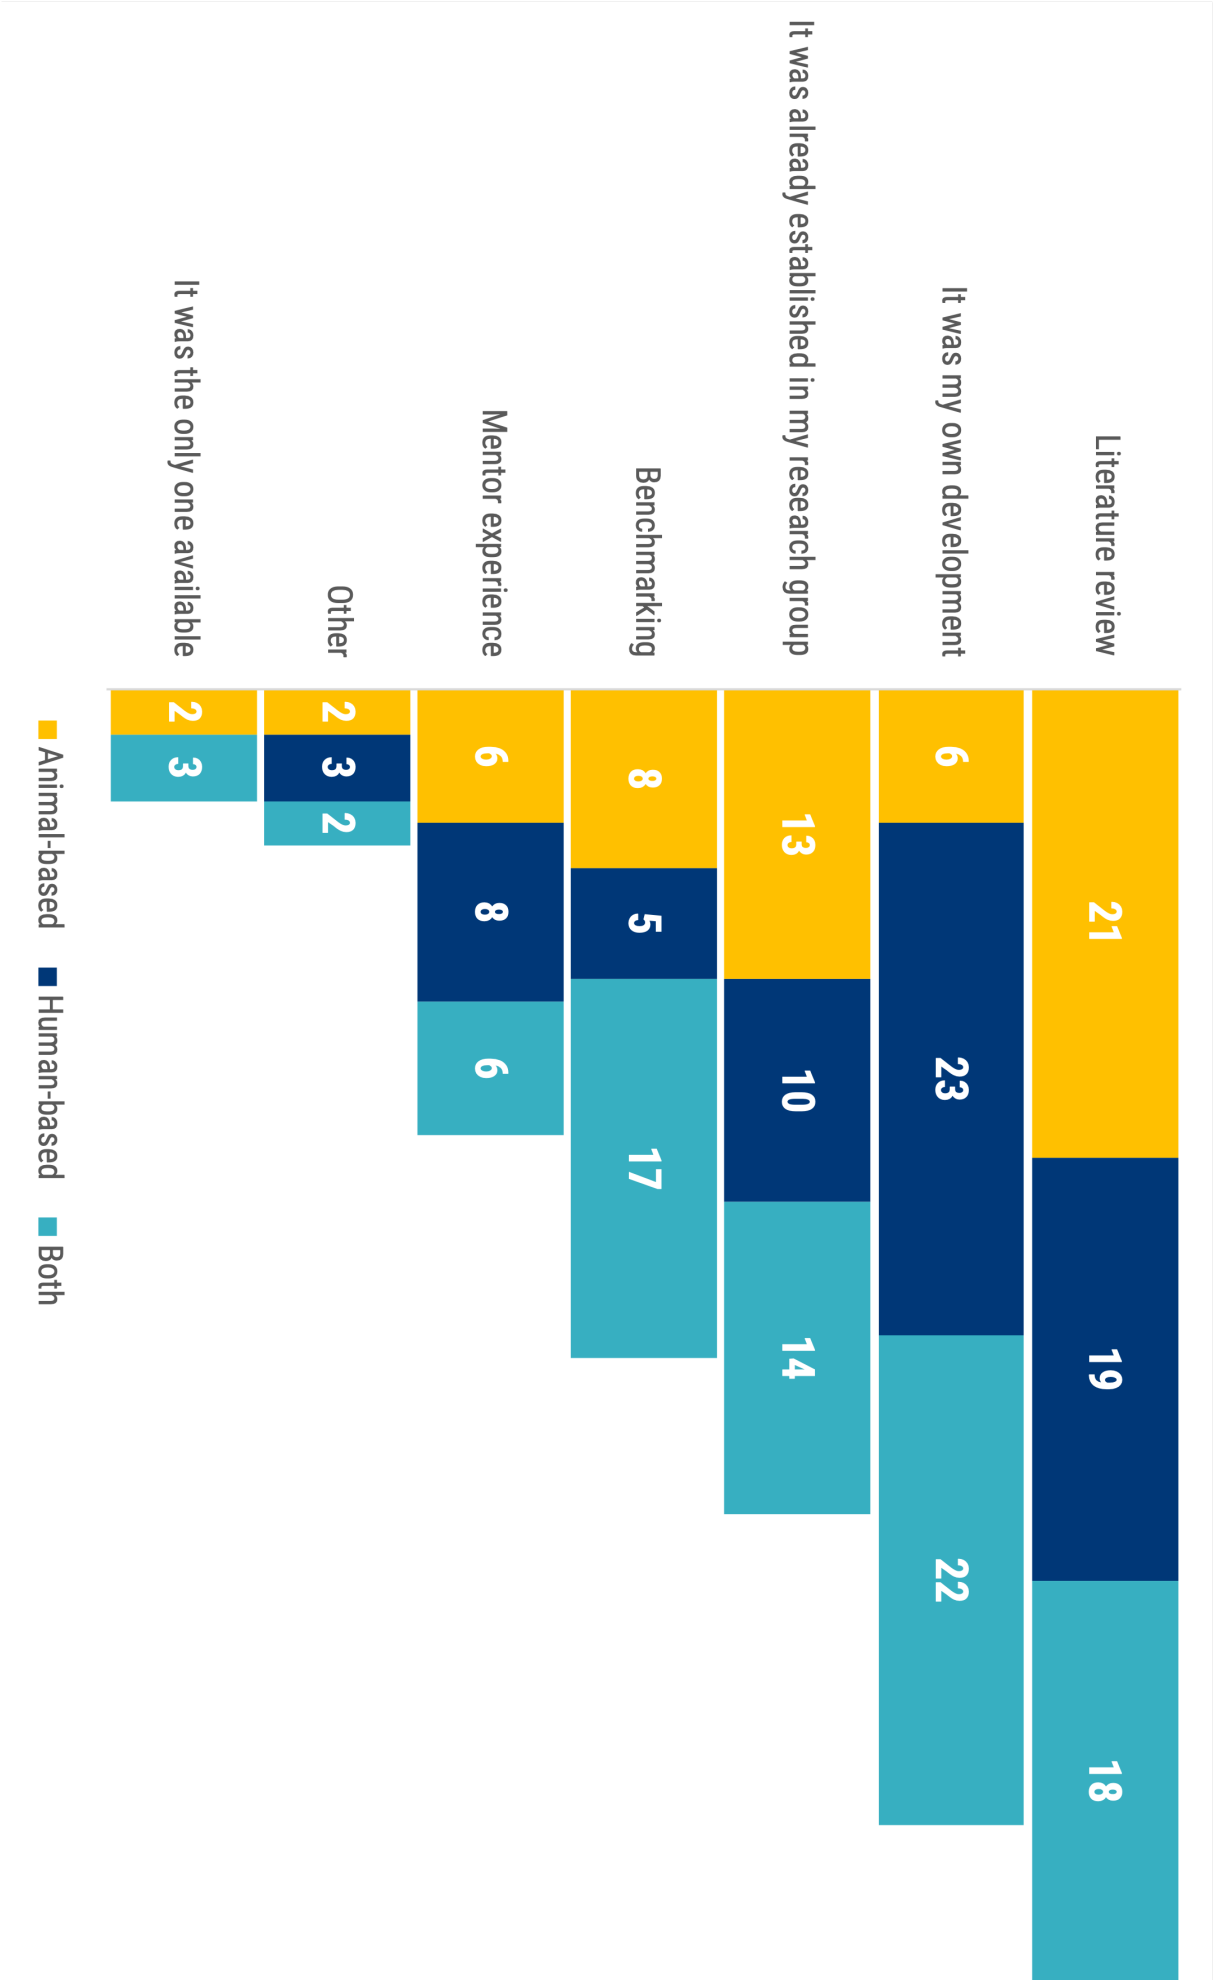

Del Pace et al. 2022

Figure 3

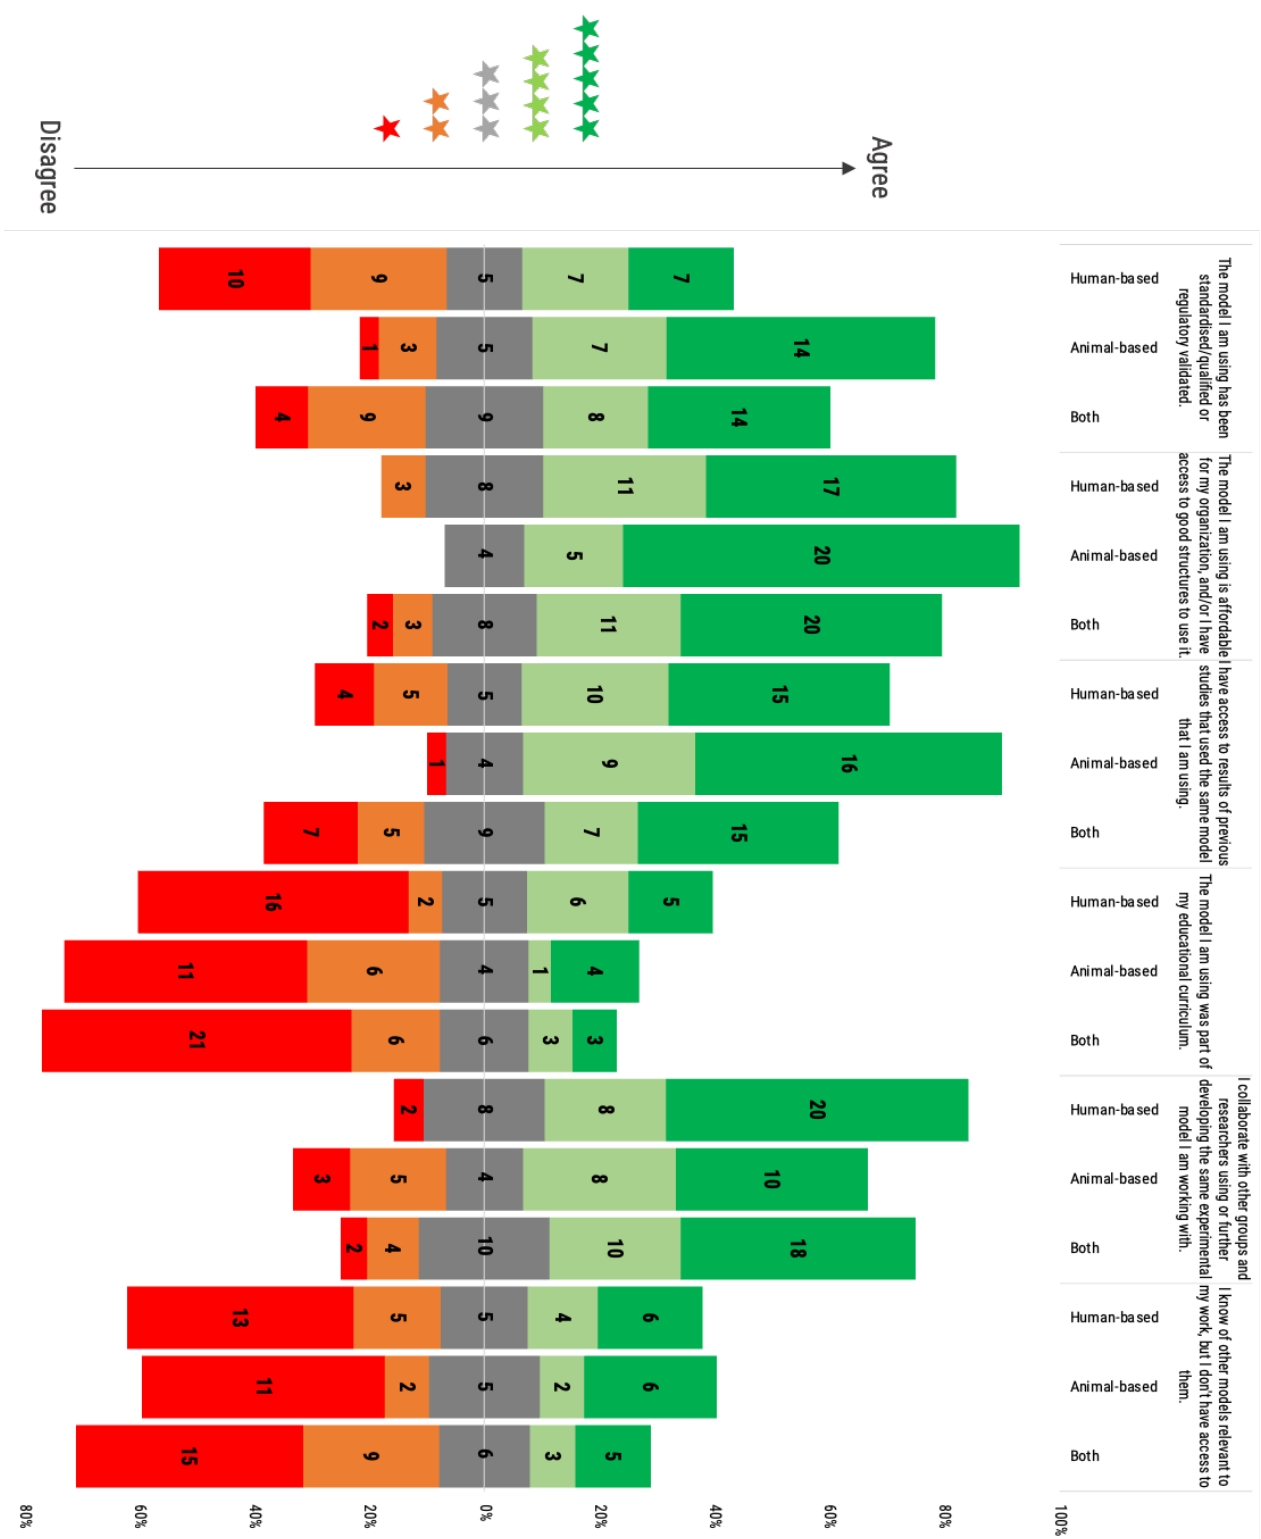

Figure 4

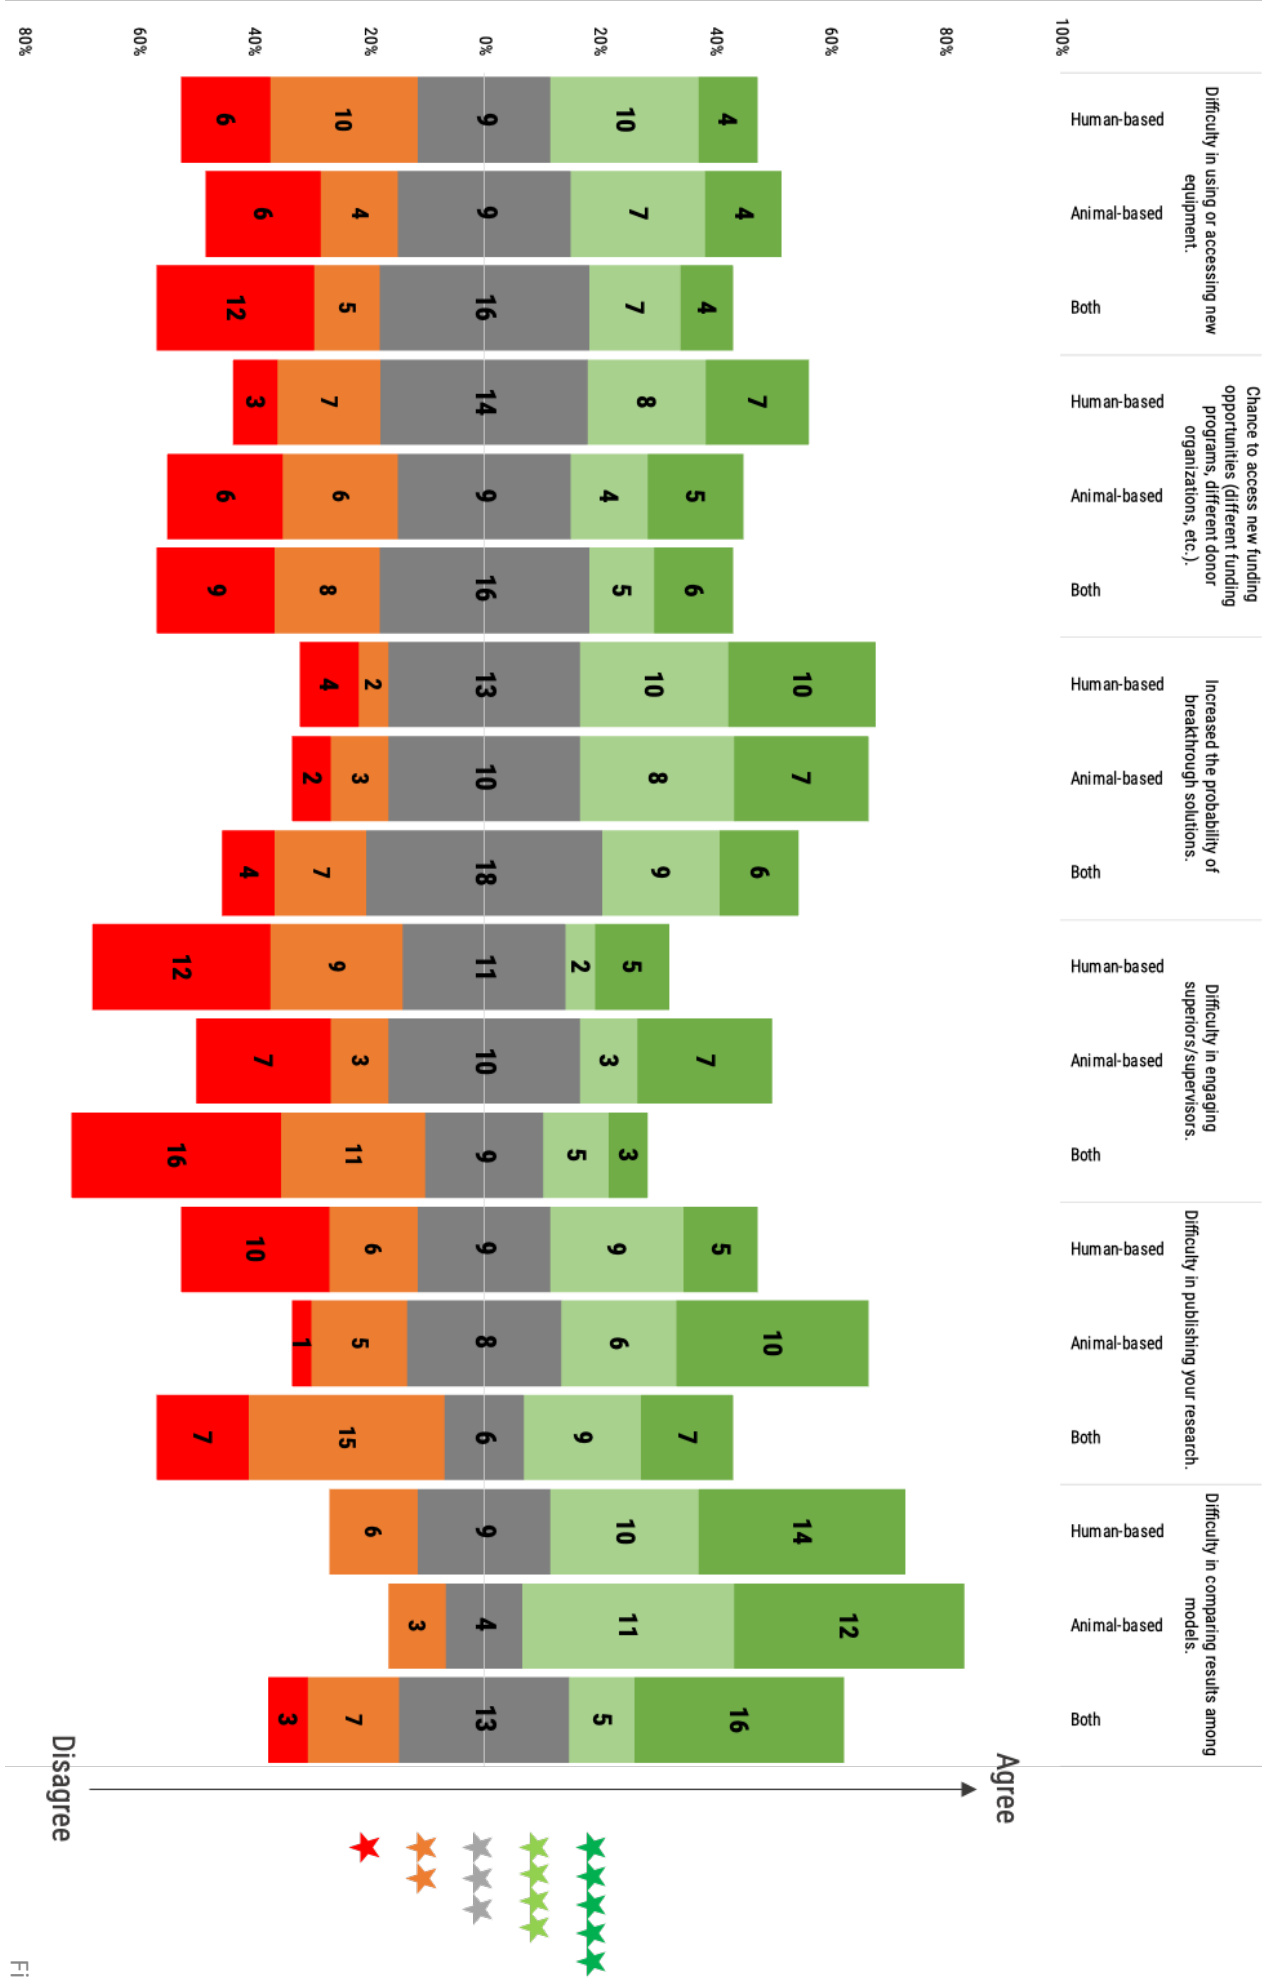

Figure 5

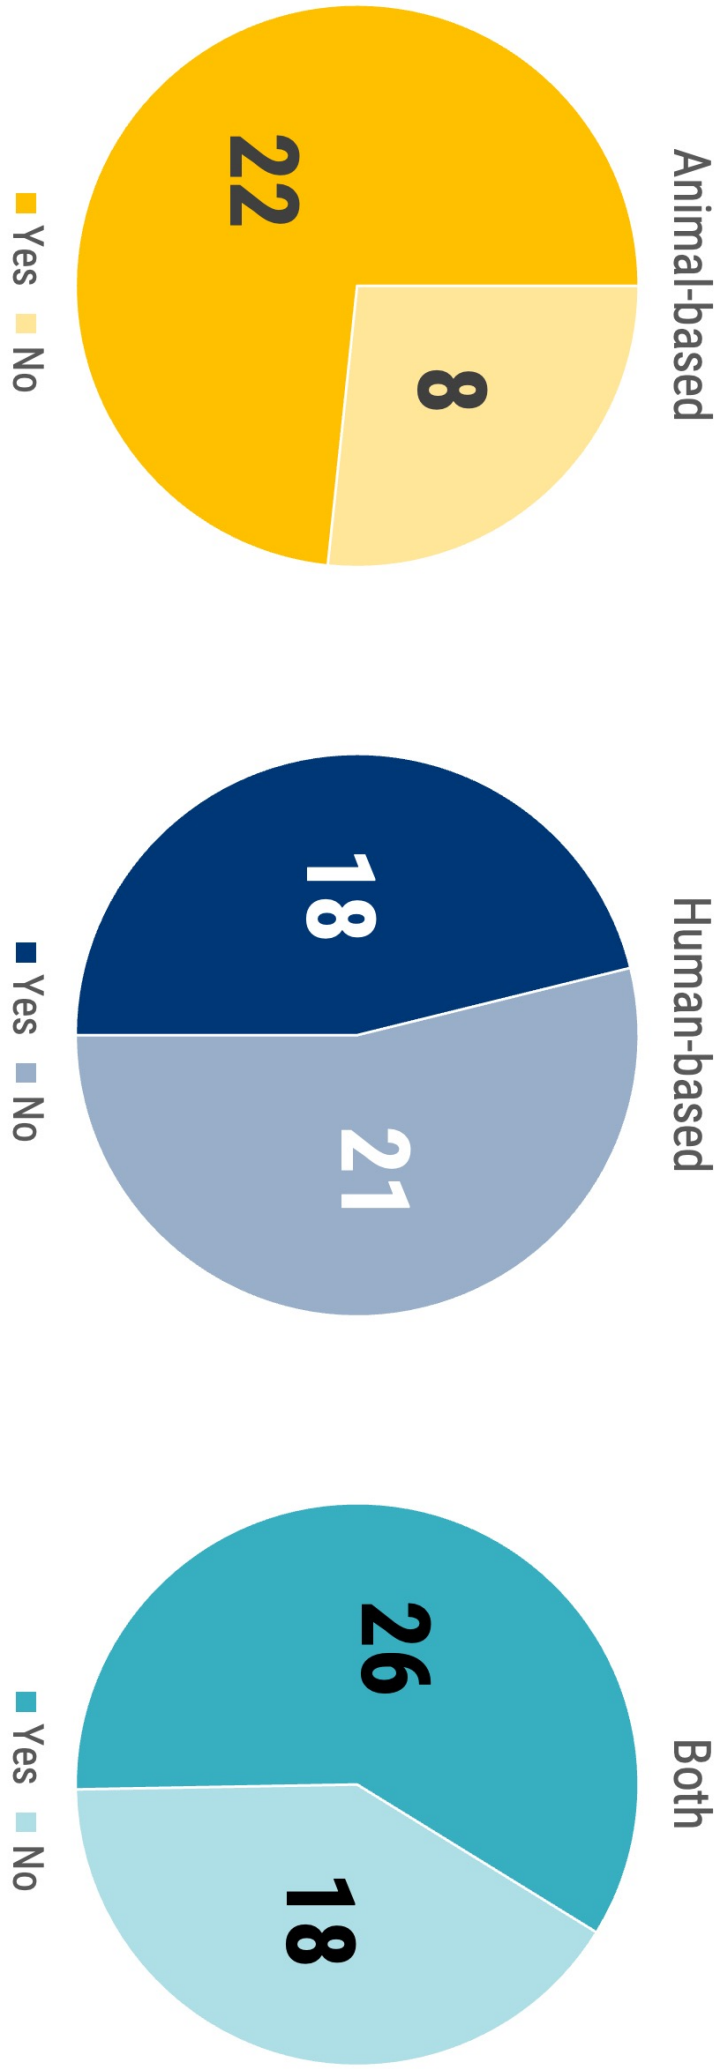

Del Pace et al. 2022

Figure 6

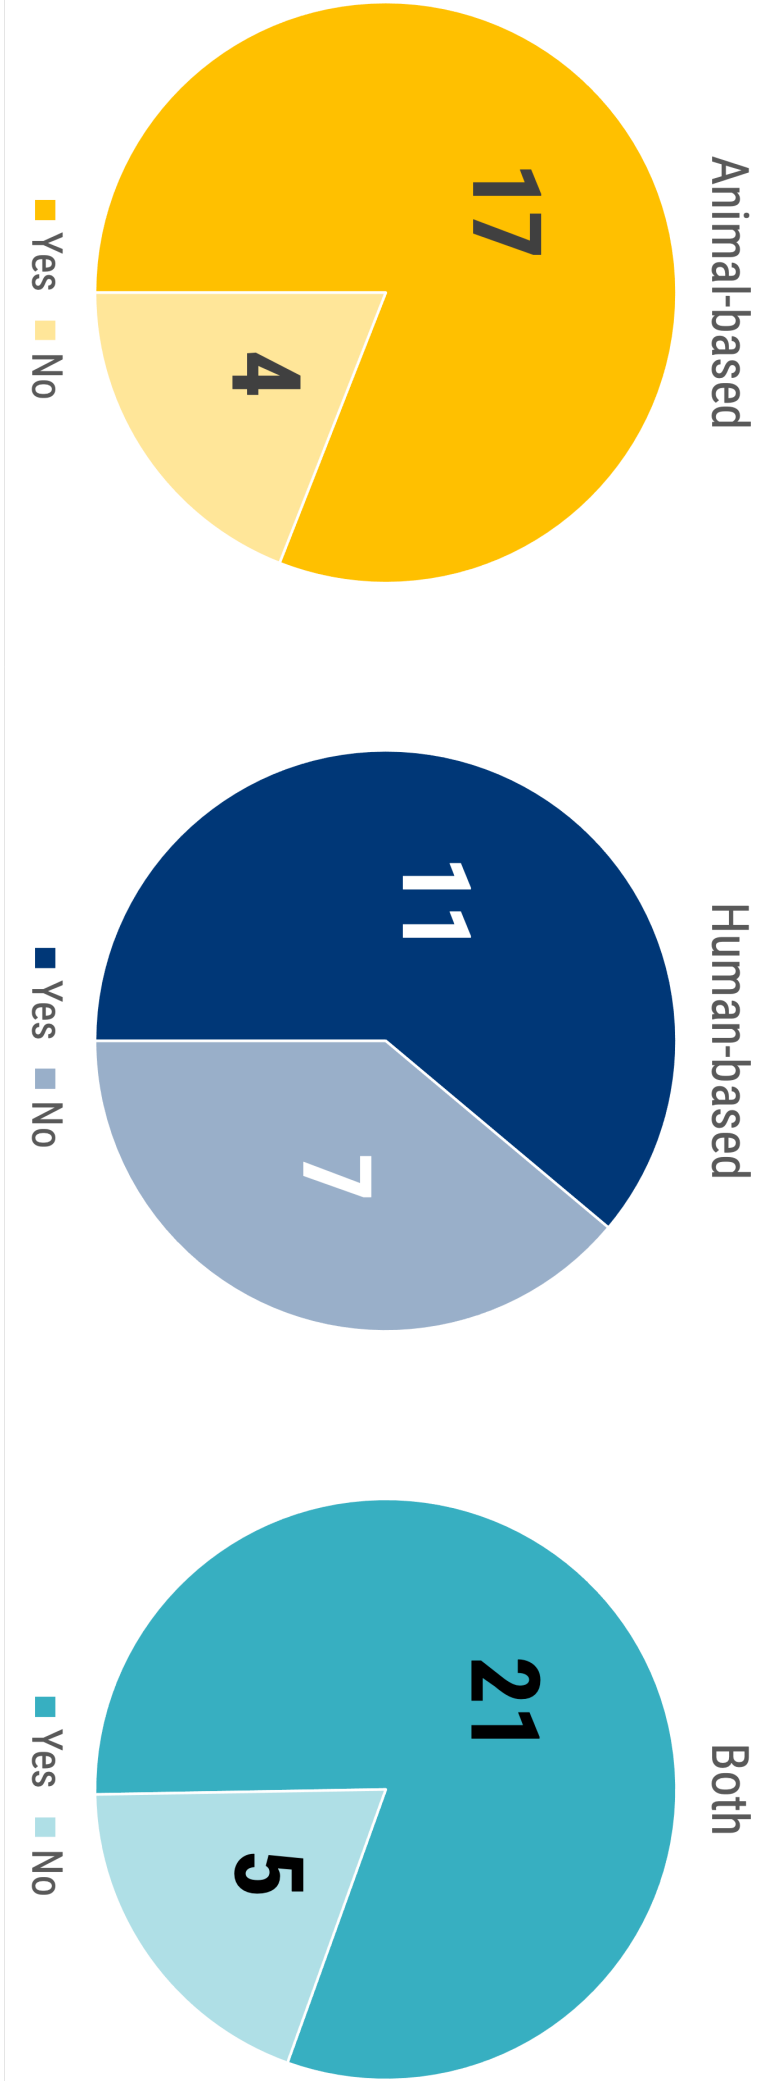

Del Pace et al. 2022

Figure 7

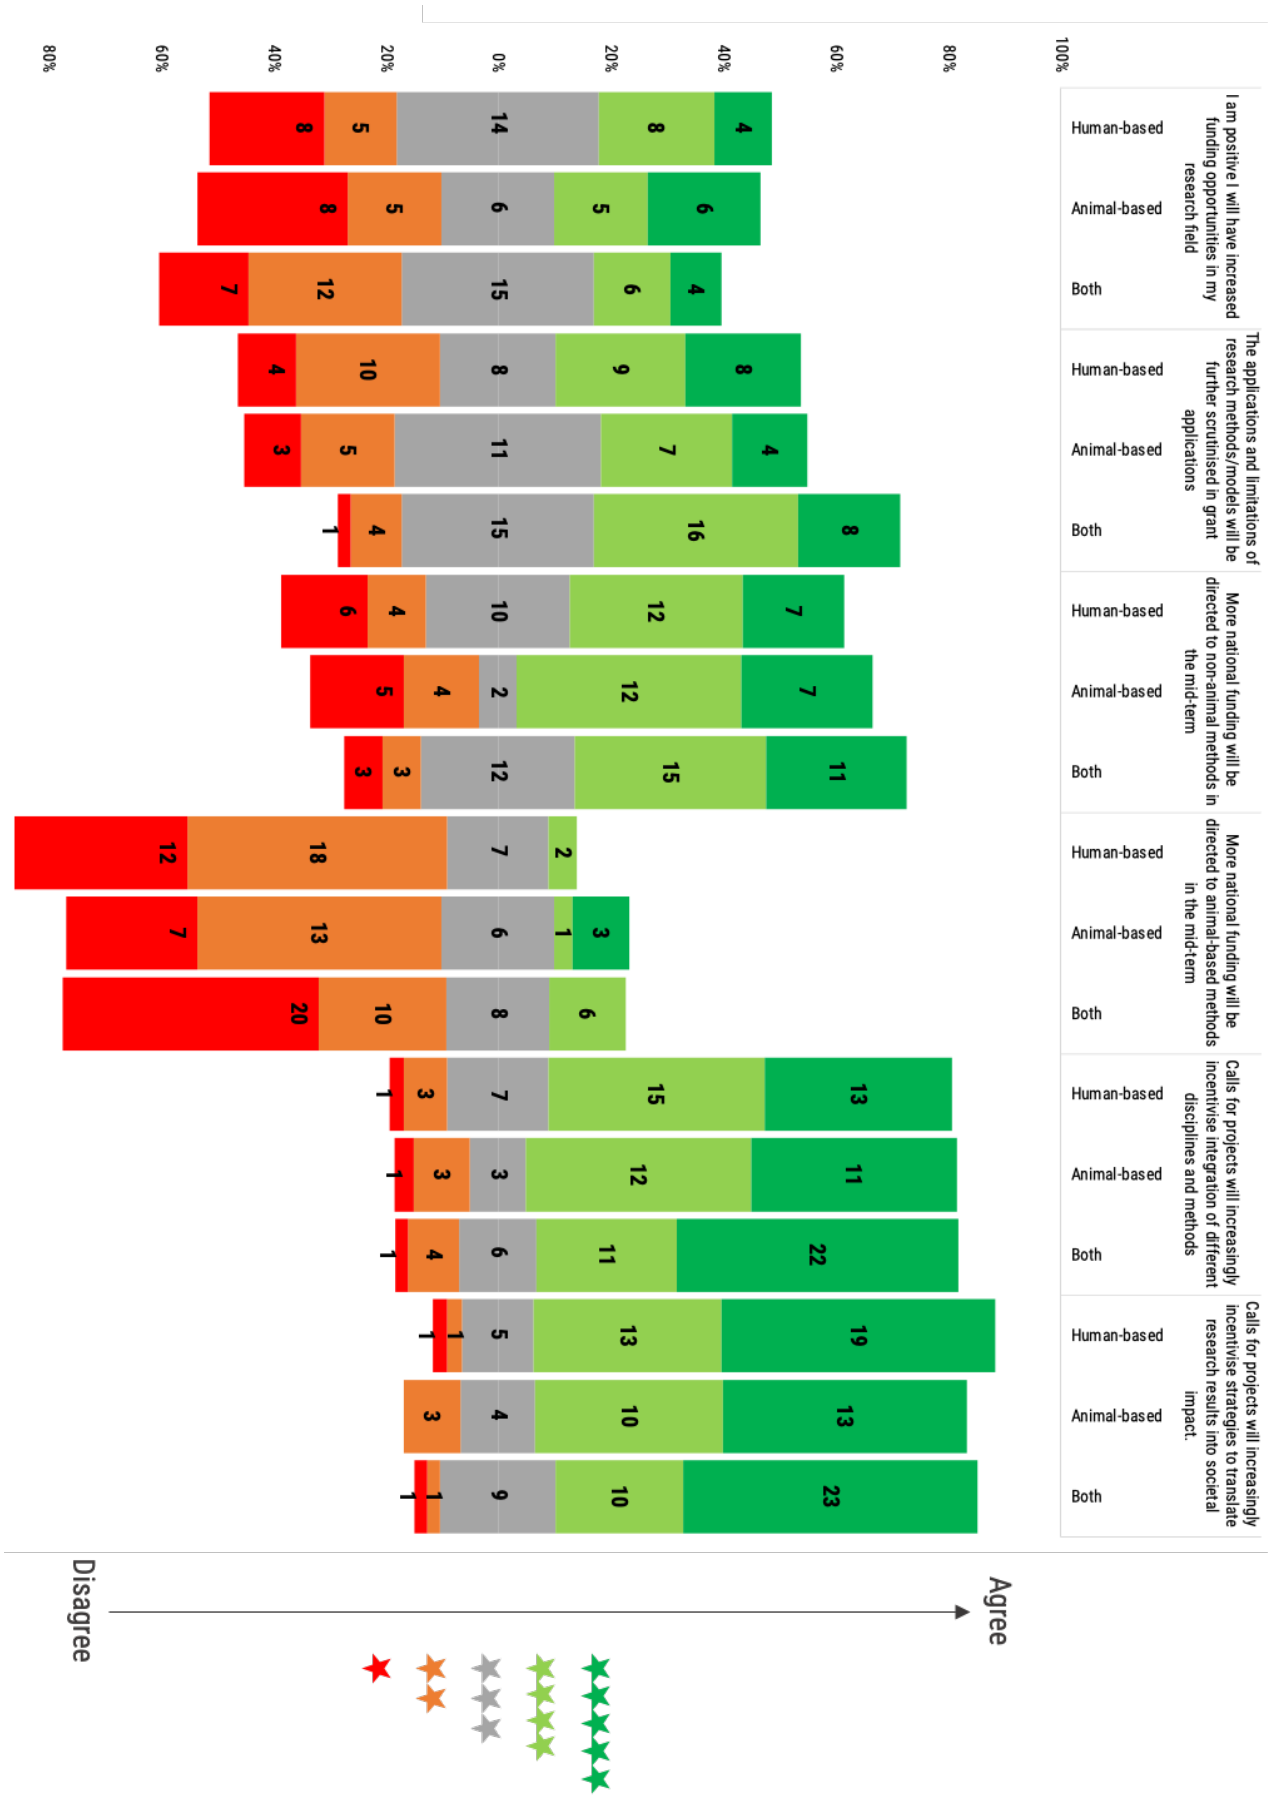

Figure 8



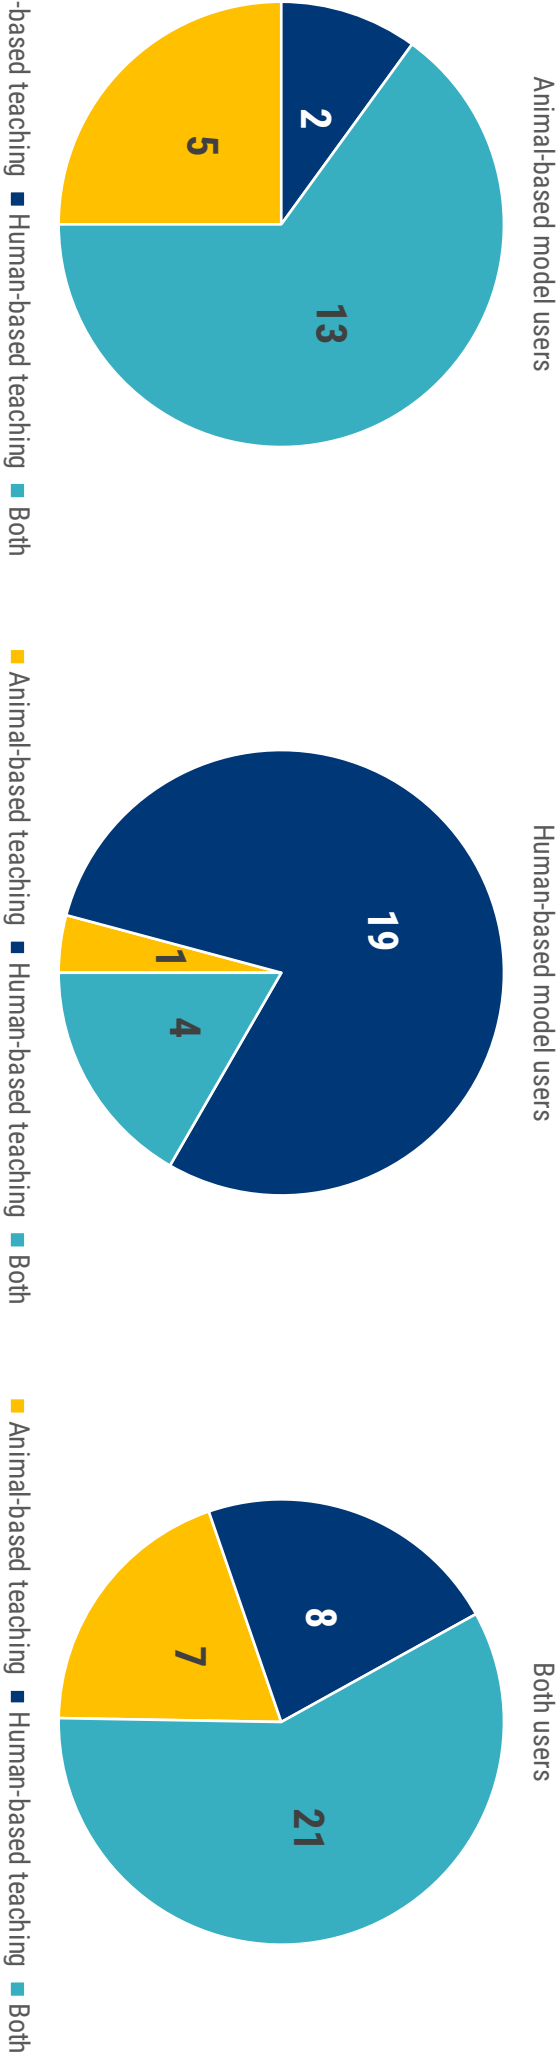

Del Pace et al. 2022

Figure 9

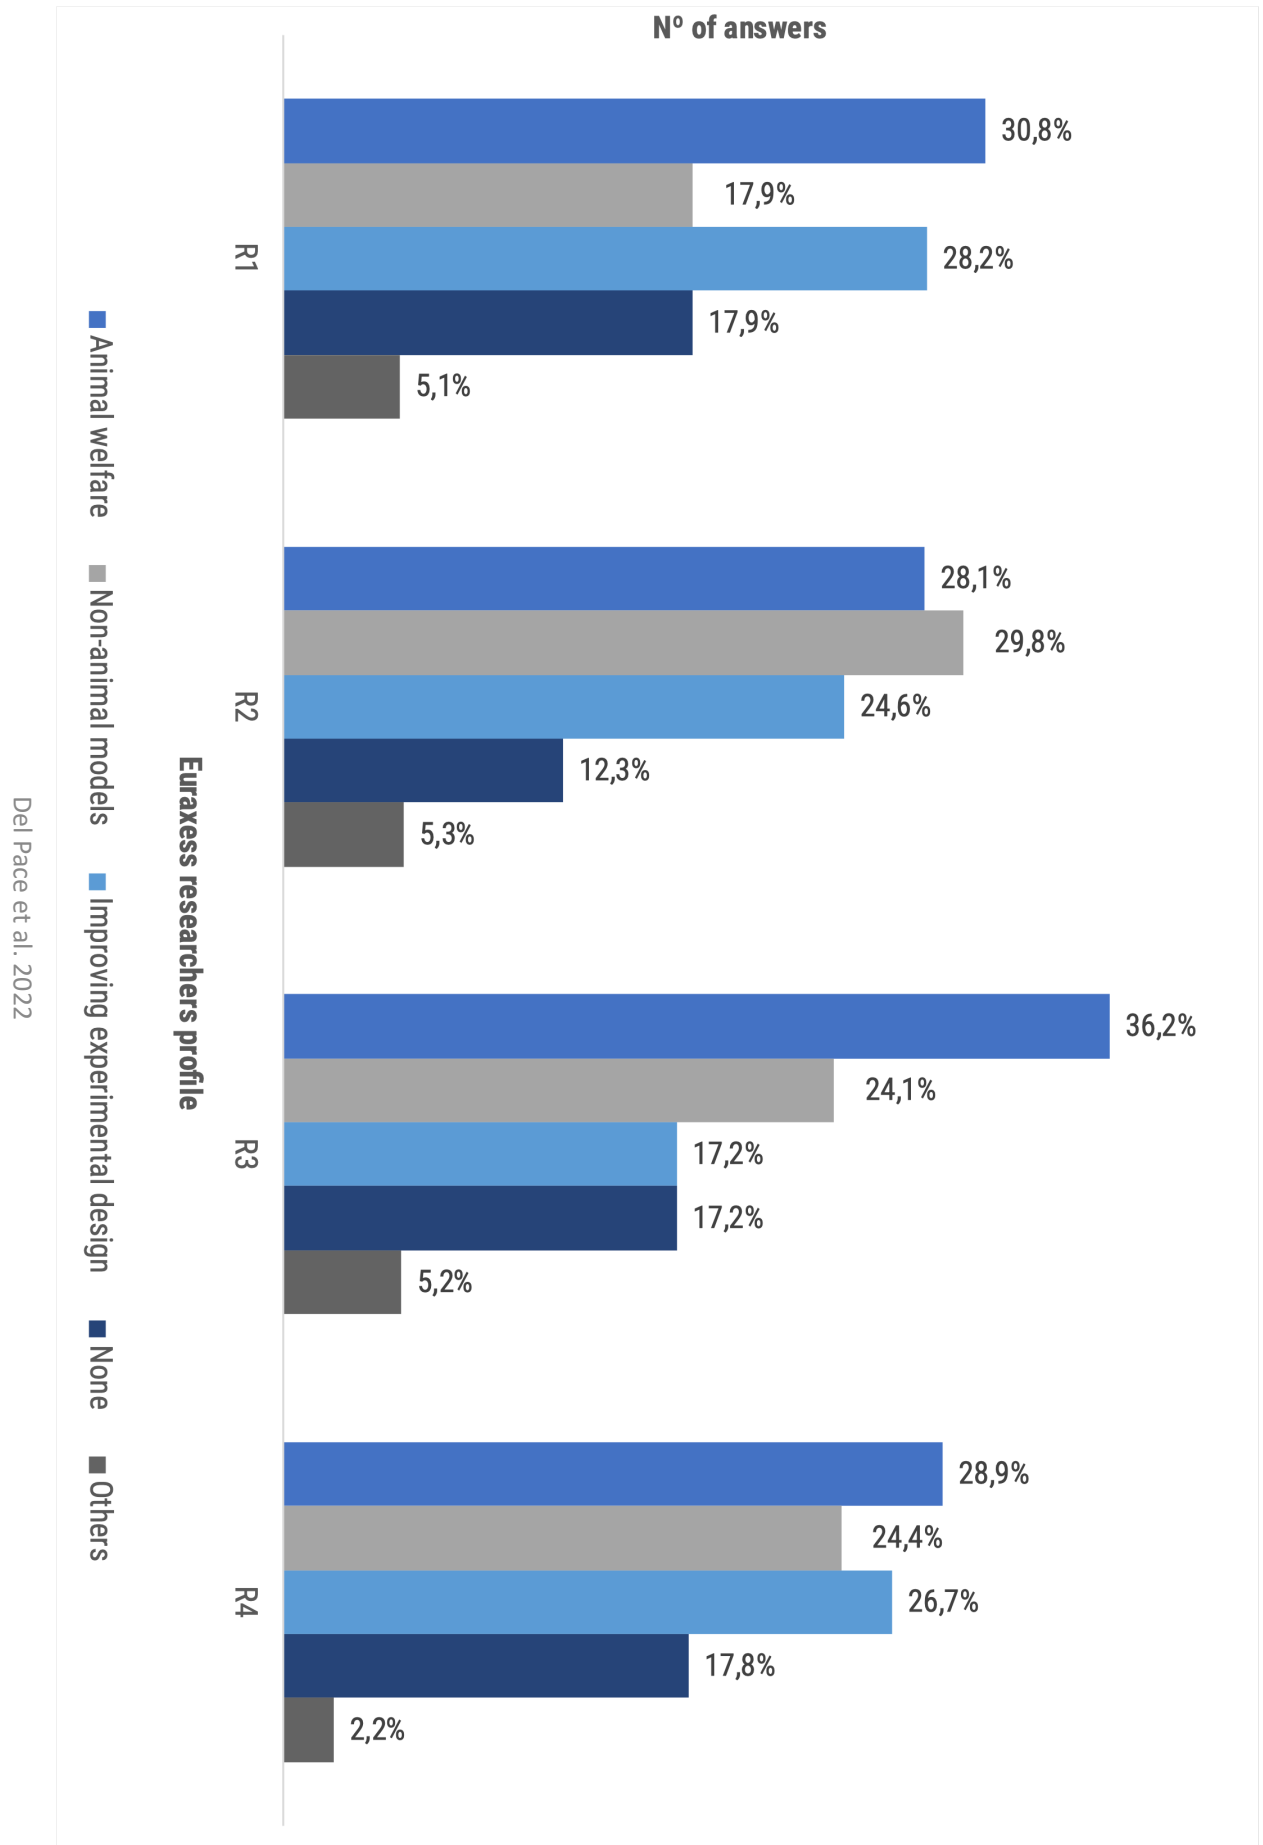

Figure 10

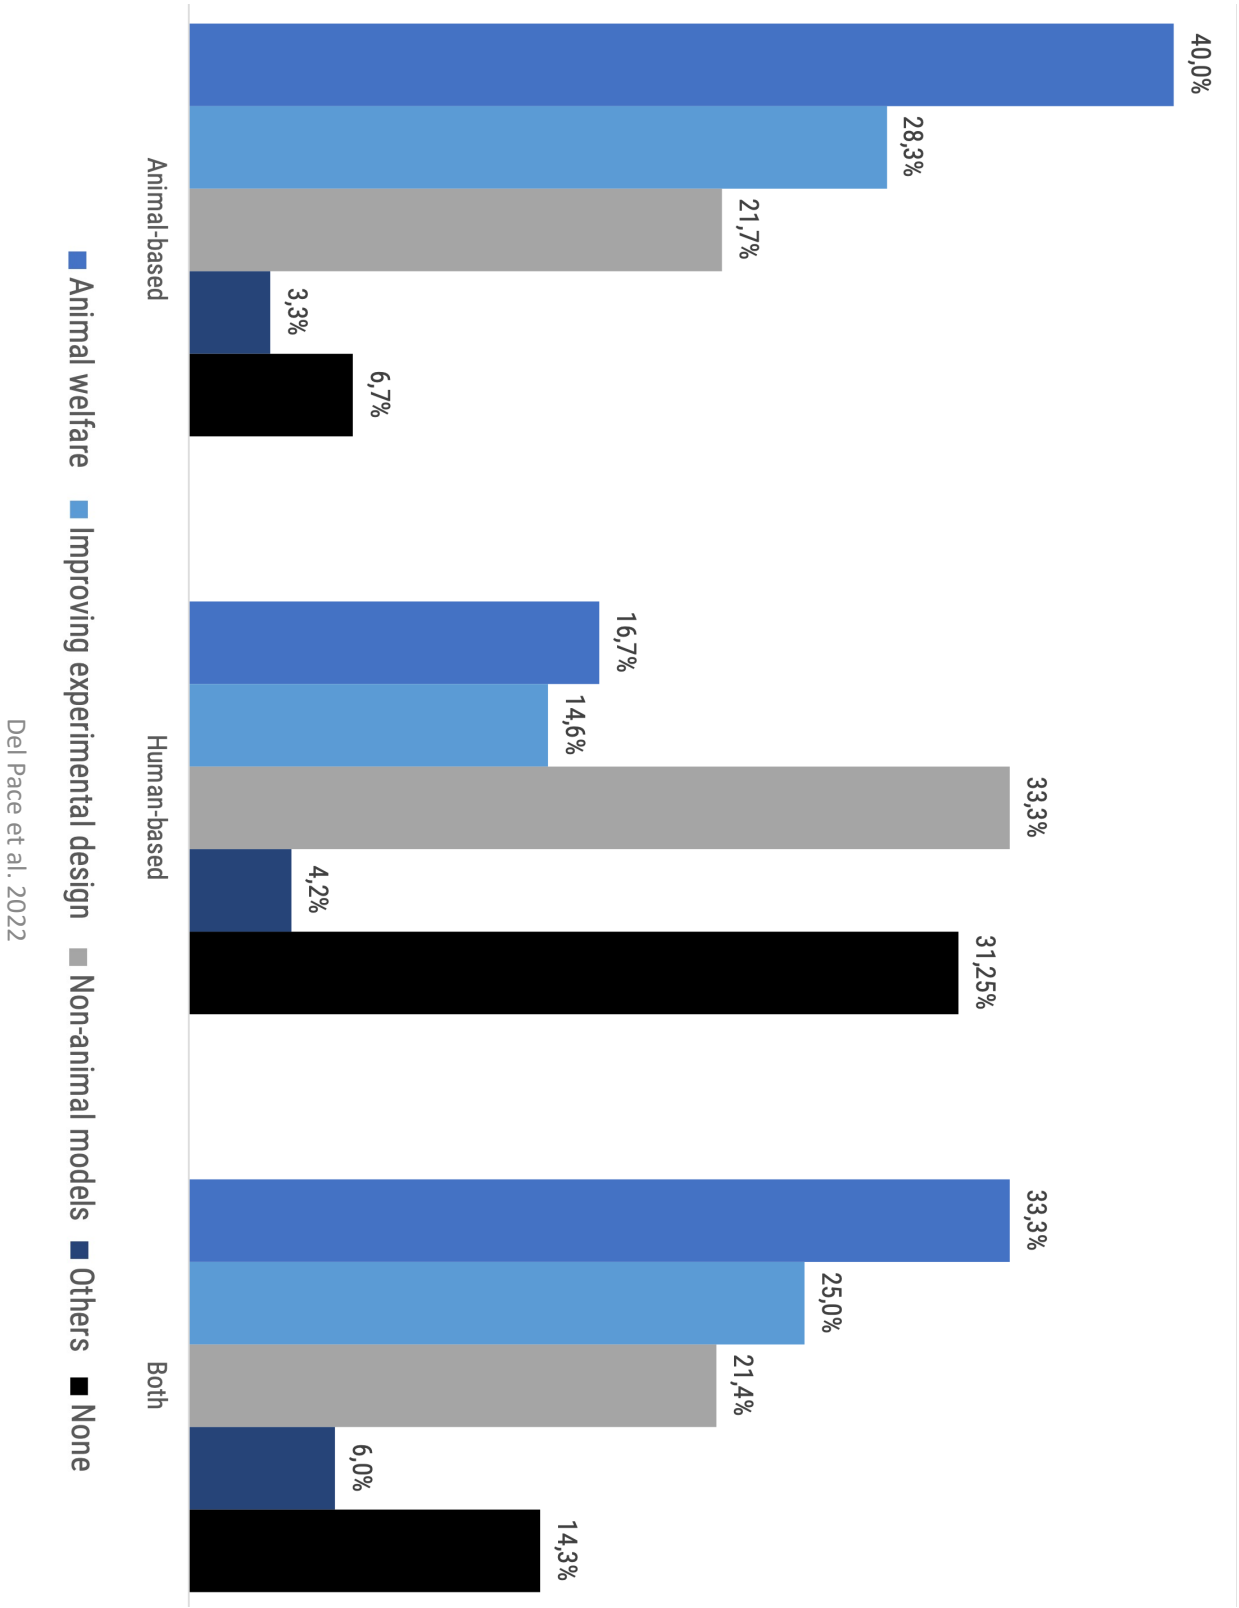

Del Pace et al. 2022

Figure 11

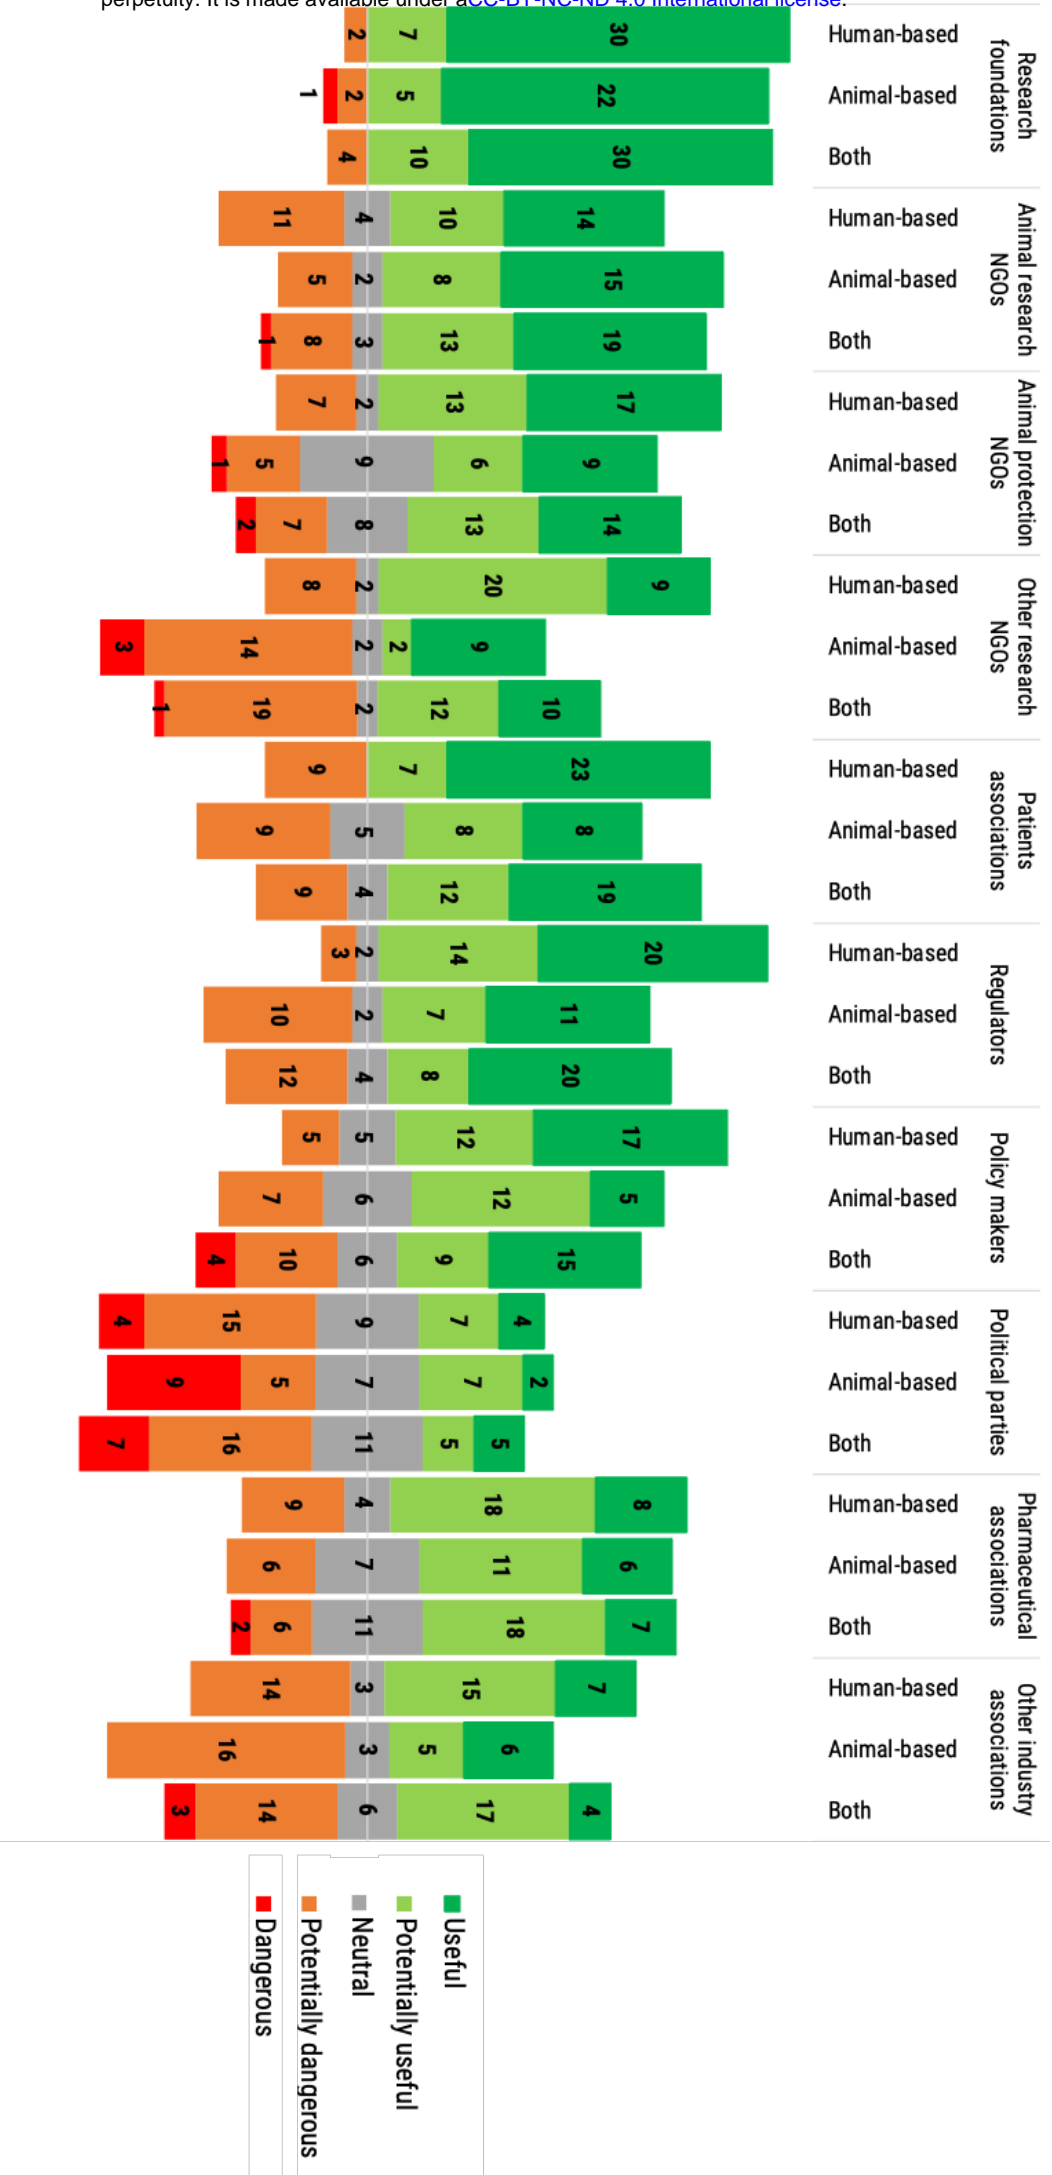

Del Pace et al. 2022

Figure 12

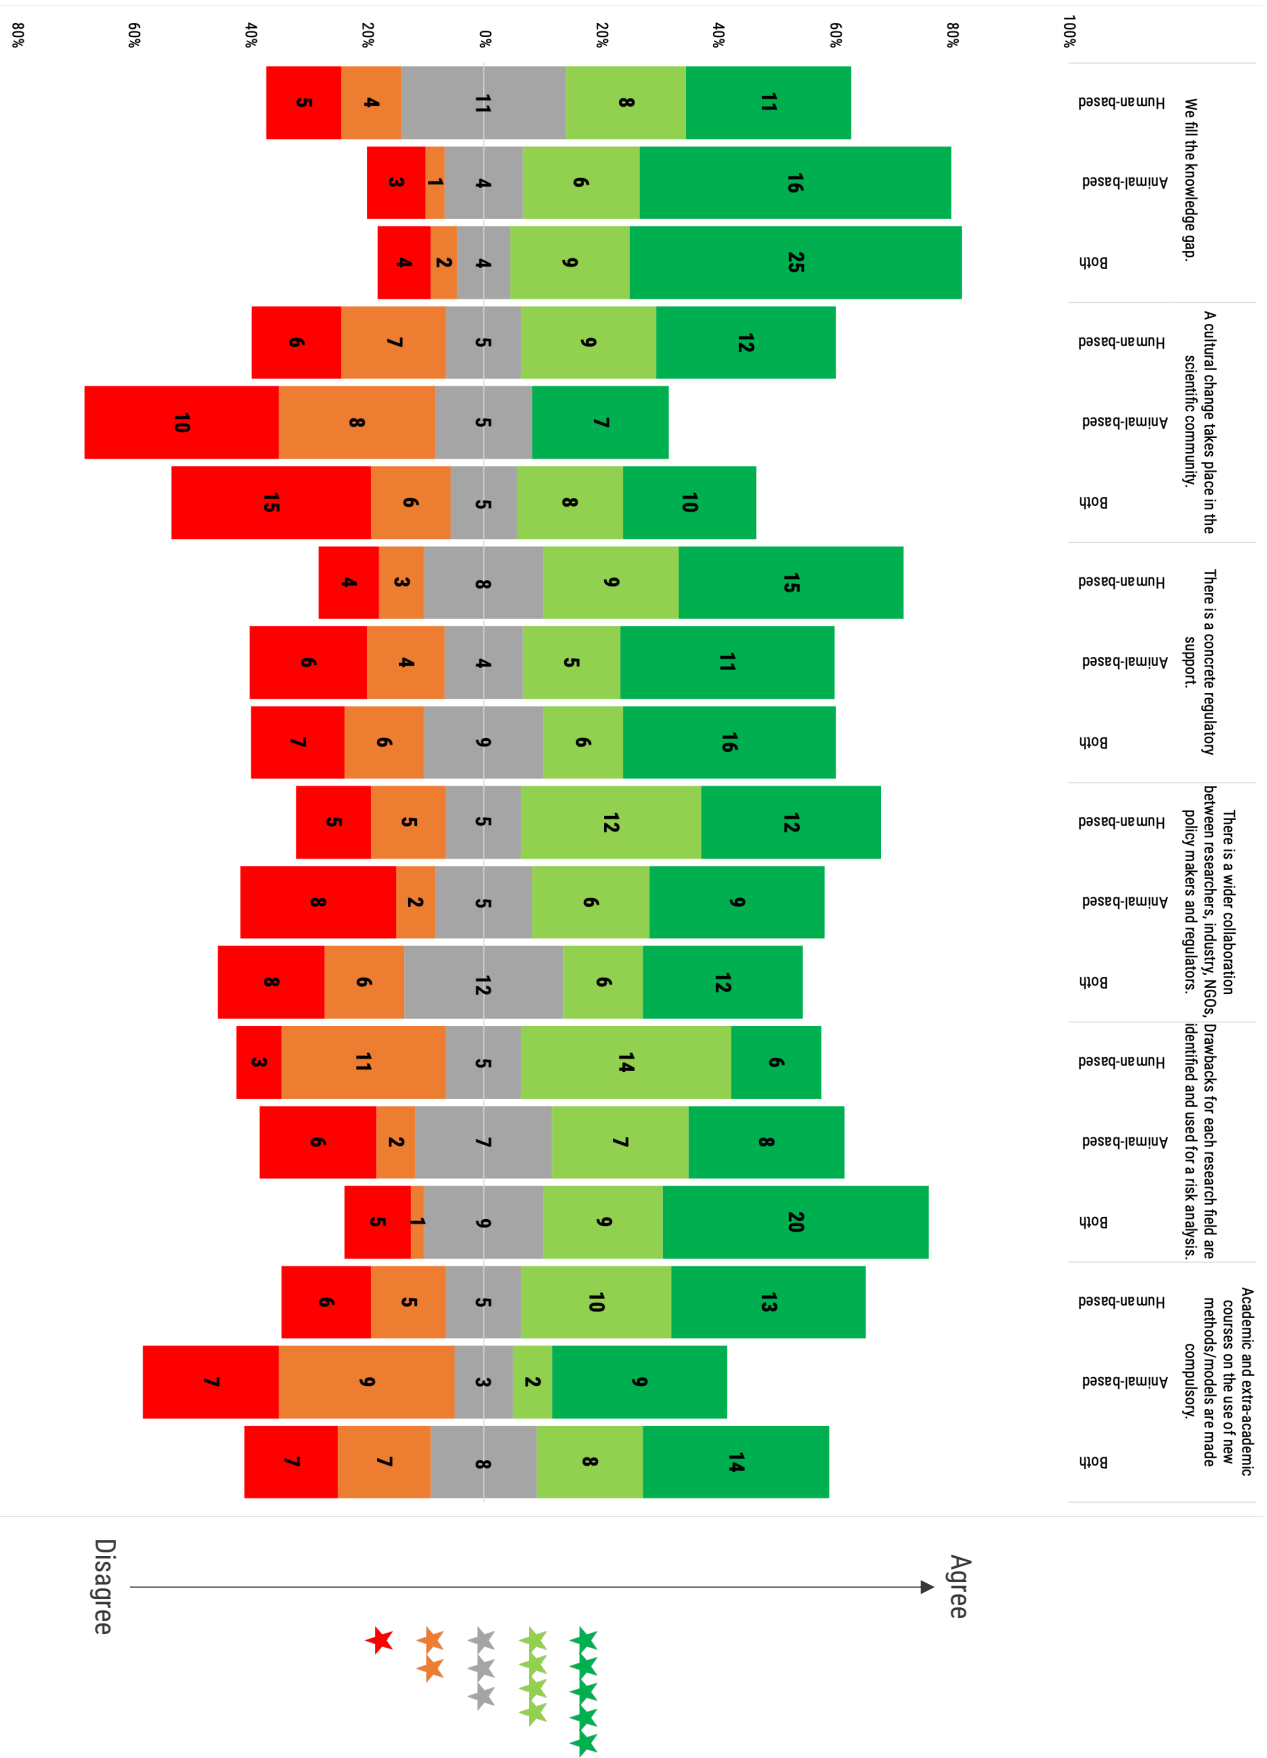

Figure 13

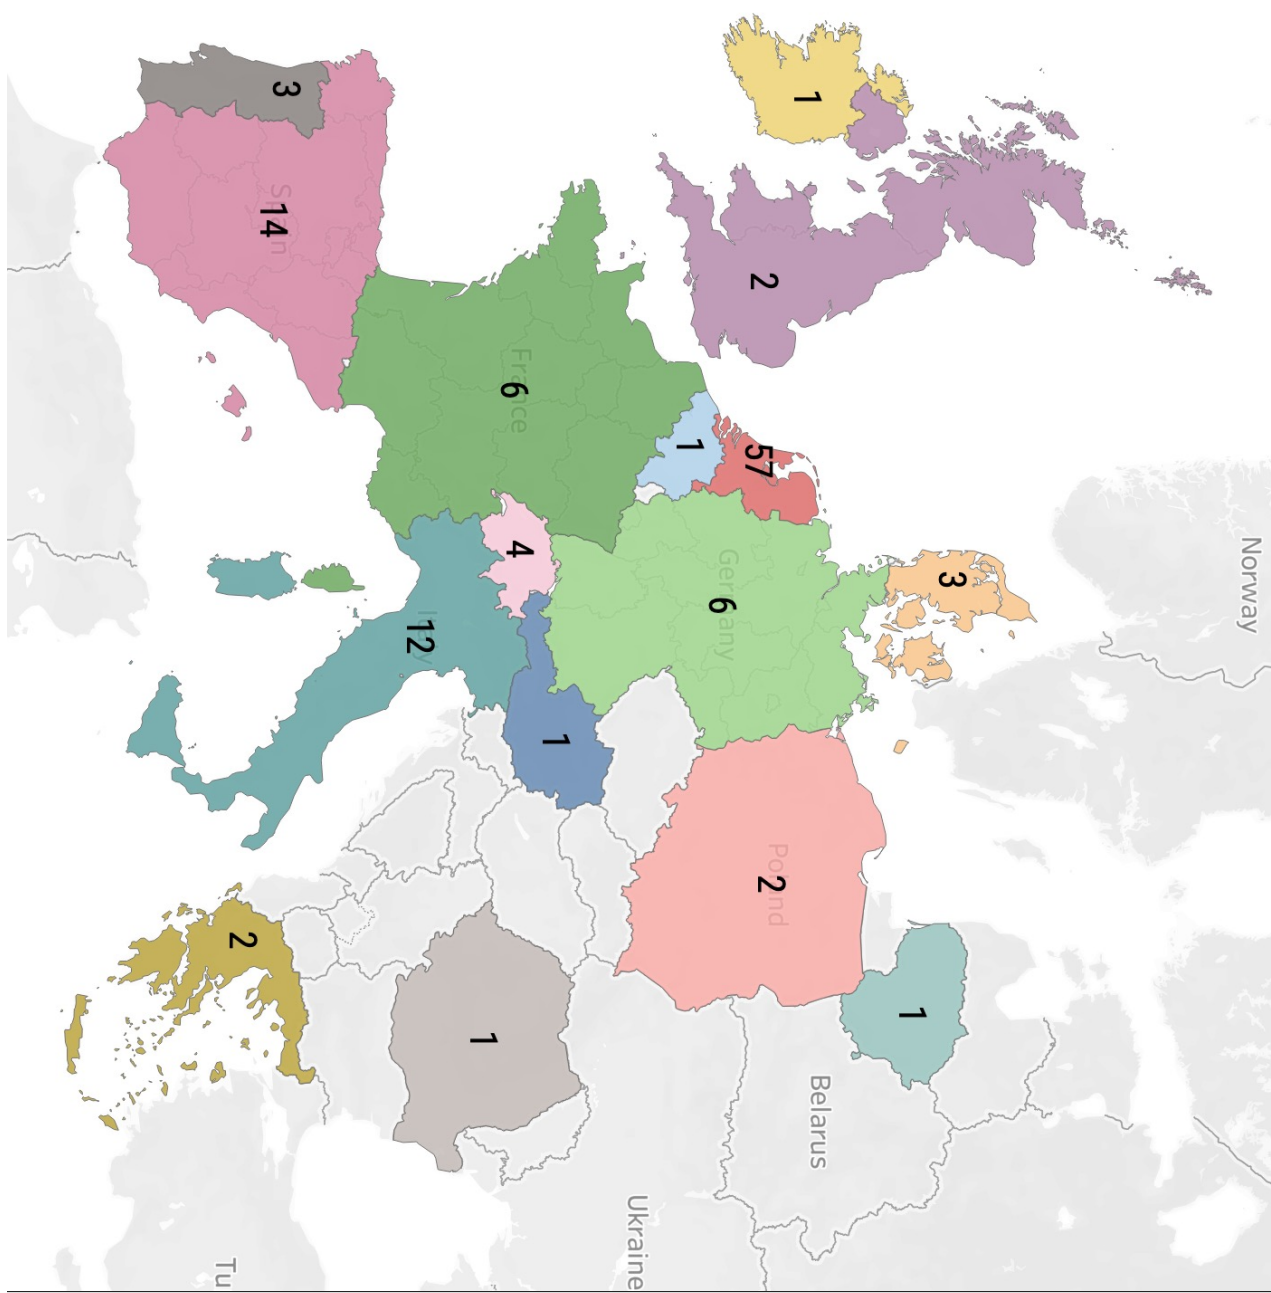

Supp. Figure 1

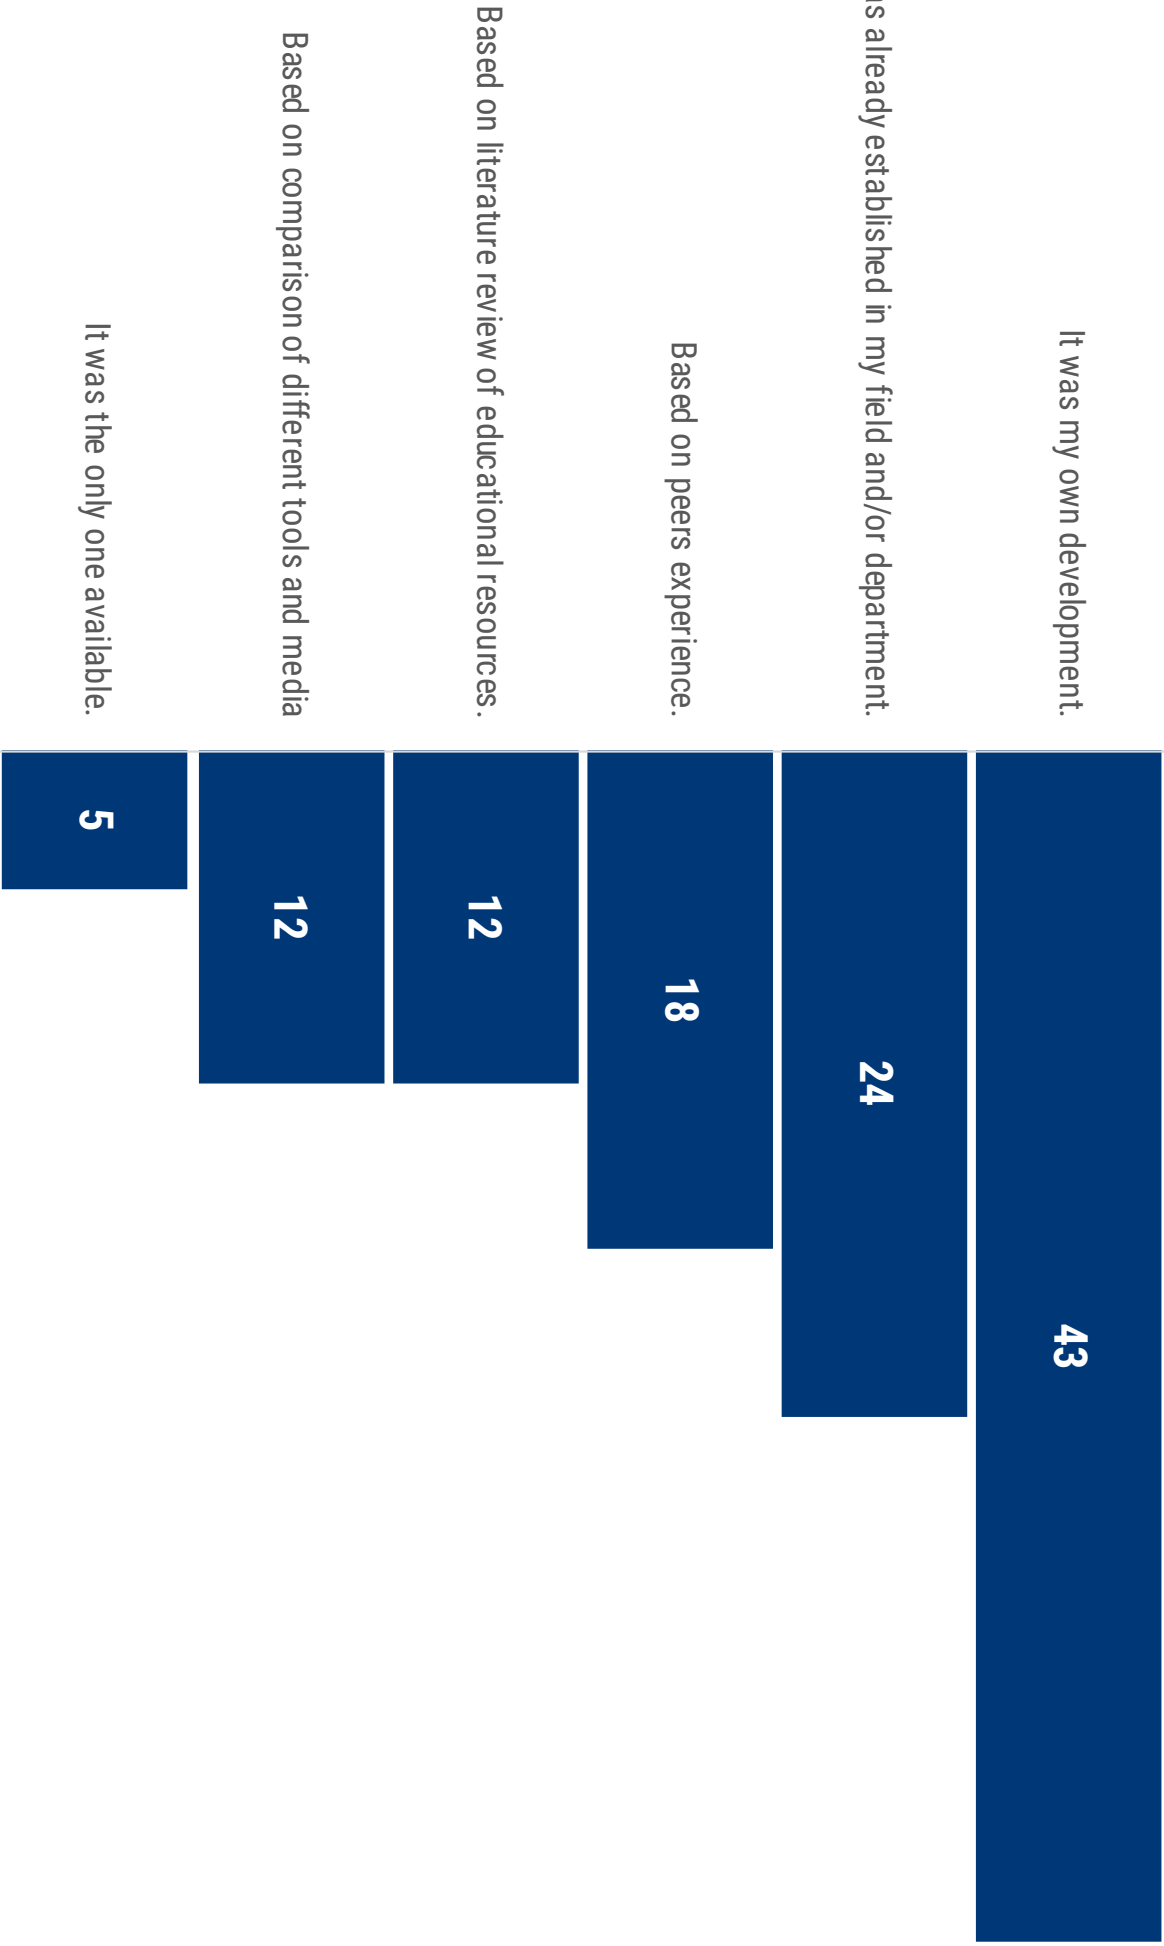

Supp. Figure 2

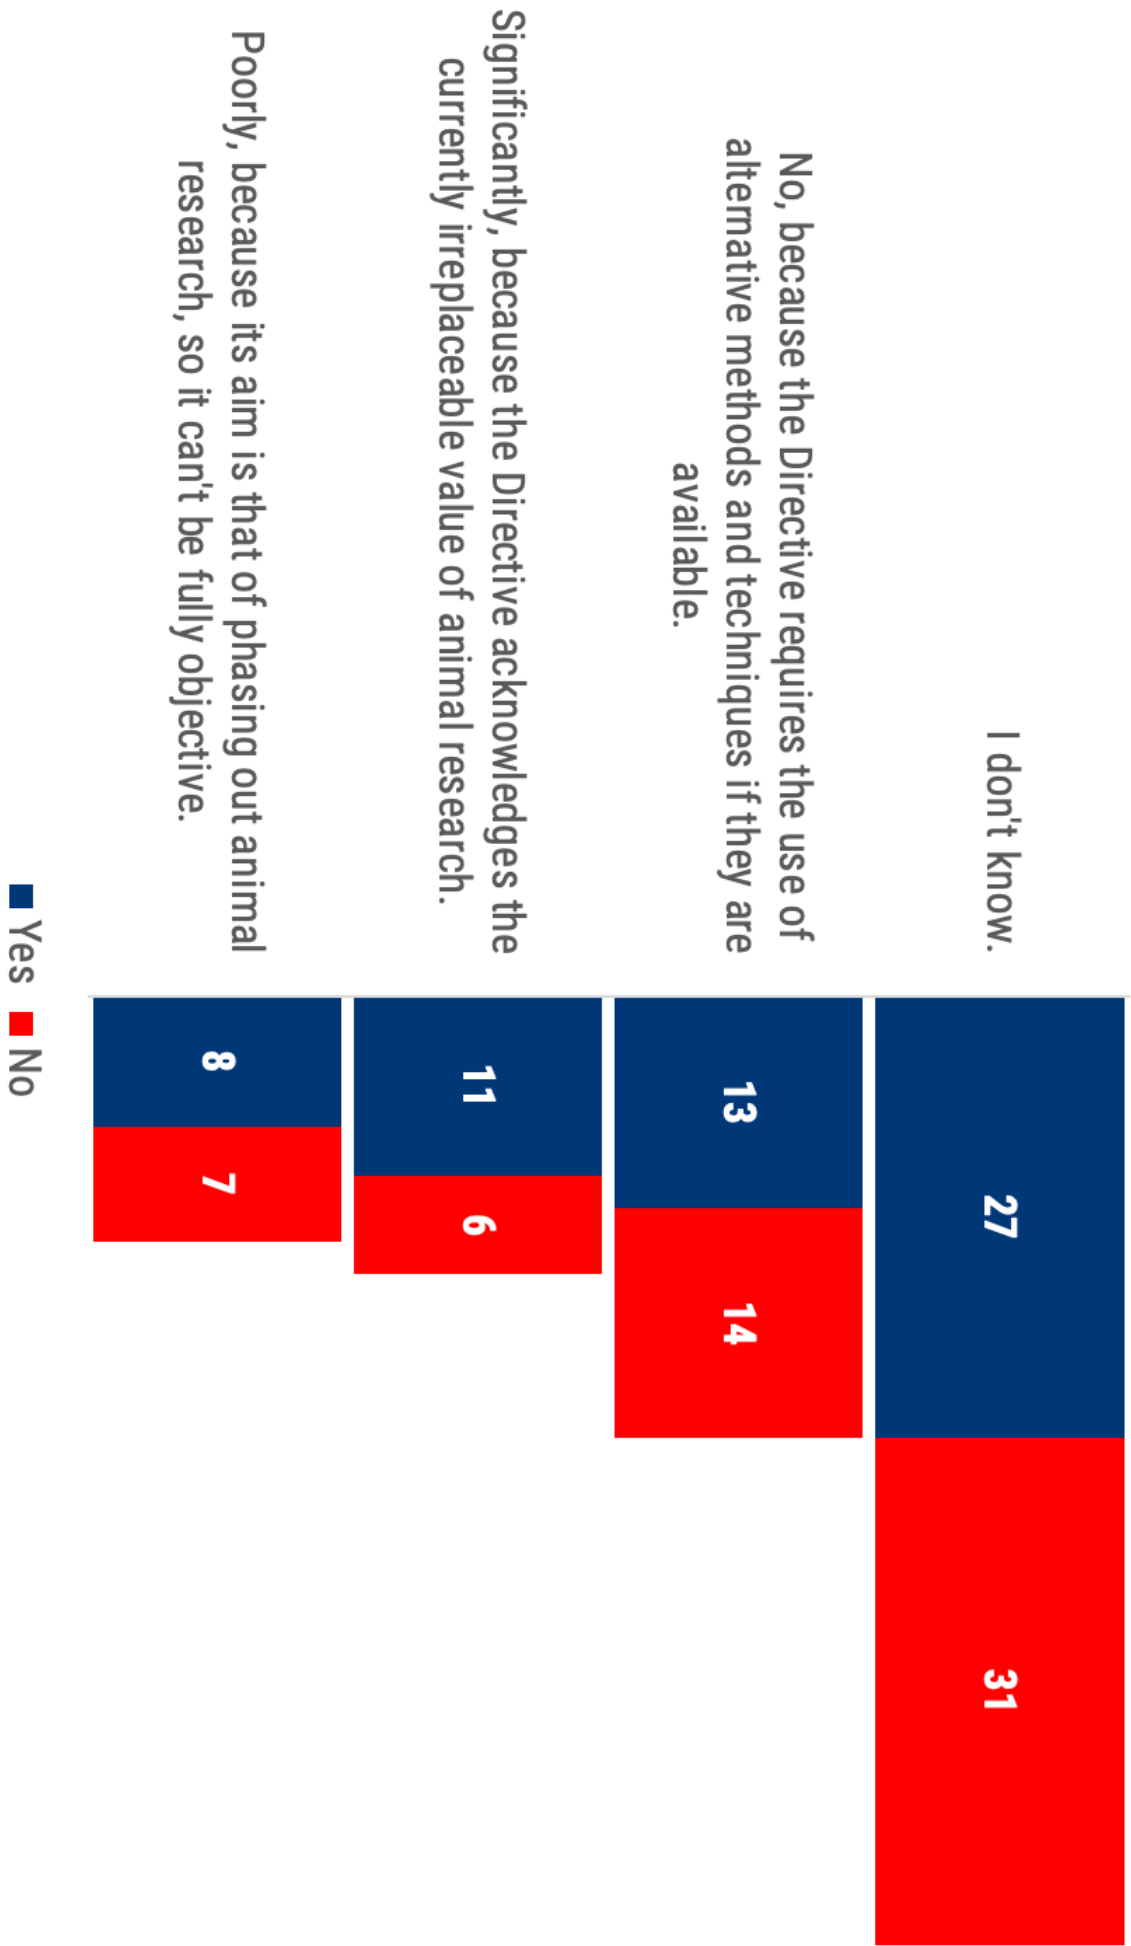

Supp. Figure 3
